# Supplementary material for: Extreme obesity induces massive beta cell expansion in mice through self-renewal and does not alter the beta cell lineage
Source: PubMed Central journal article supplement (PMC4869735; doi:10.1007/s00125-016-3922-7), 2016-03-22
Supplement: 125_2016_3922_MOESM1_ESM.pdf [file 125_2016_3922_MOESM1_ESM.pdf]

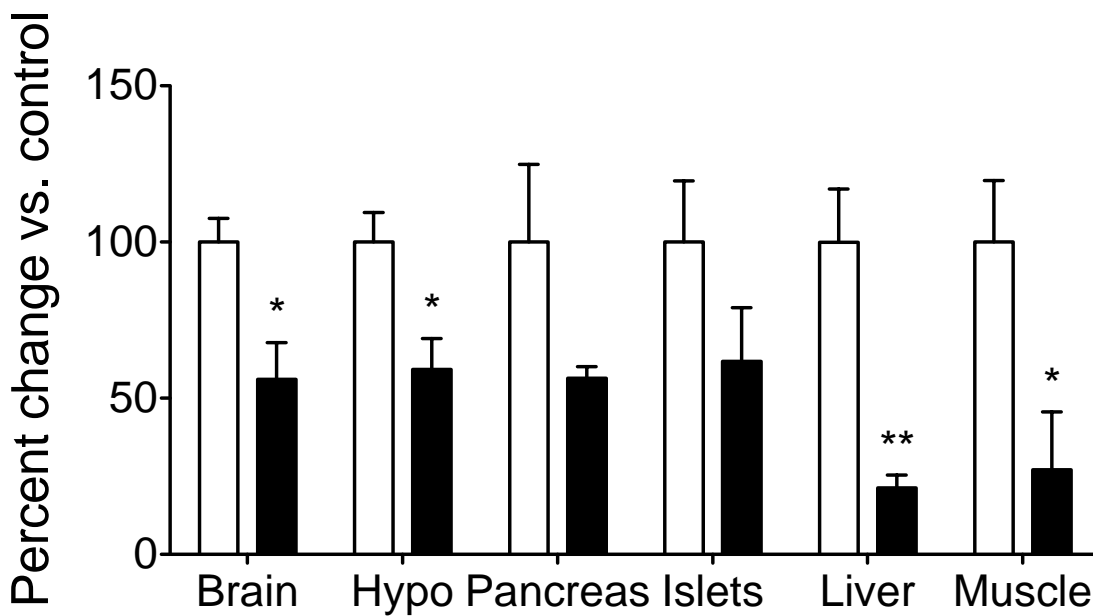

ESM Fig. 1. The leptin receptor gene (*LepR*) is significantly reduced in tamoxifen-treated *Ubc-Cre<sup>ERT2</sup> LepR<sup>loxP/loxP</sup>* mice. Quantitative PCR analysis from brain, hypothalamus, pancreas, isolated islets, liver, and muscle in *LepR<sup>loxP/loxP</sup>* (control; white bars) and *Ubc-Cre<sup>ERT2</sup> LepR<sup>loxP/loxP</sup>* (black bars) mice represented as the percentage change versus control for each tissue. Mean±SEM, 3-4 animals/group. \* $p < 0.05$ , \*\* $p < 0.01$  versus control.
