# Supplementary material for: Extreme obesity induces massive beta cell expansion in mice through self-renewal and does not alter the beta cell lineage
Source: PubMed Central journal article supplement (PMC4869735; doi:10.1007/s00125-016-3922-7), 2016-03-22
Supplement: 125_2016_3922_MOESM2_ESM.pdf [file 125_2016_3922_MOESM2_ESM.pdf]

*Ubc Cre Rosa Brainbow2.1 LepR<sup>loxP/loxP</sup> – 5 day washout*

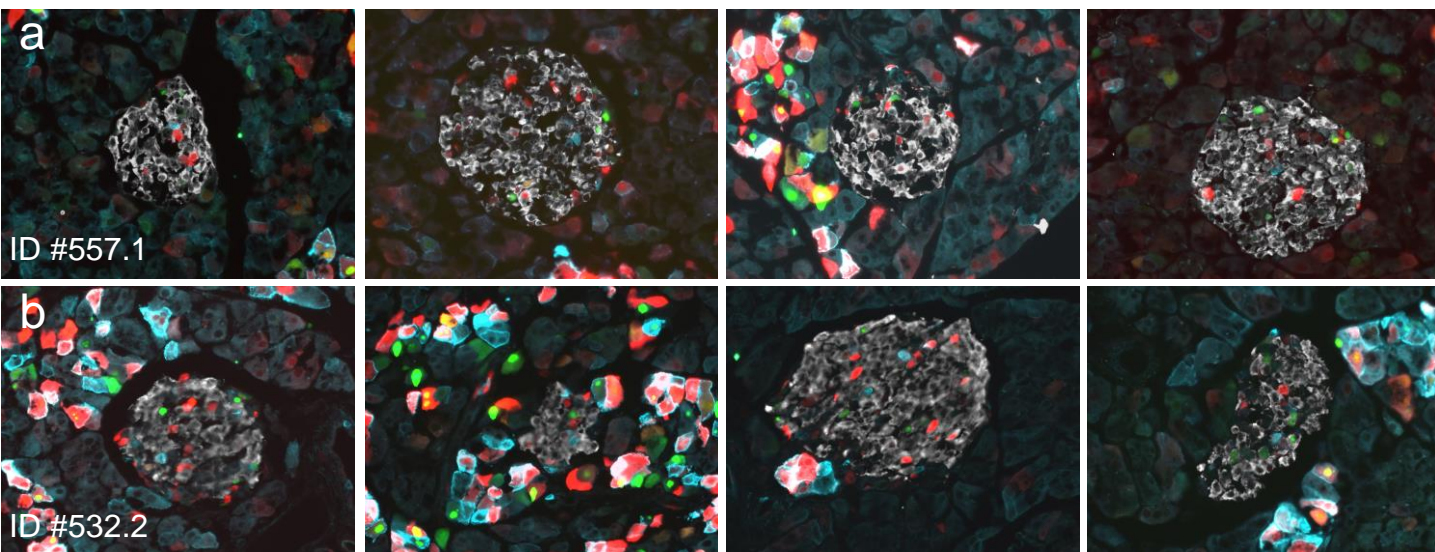

*Ubc Cre Rosa Brainbow2.1 LepR<sup>loxP/loxP</sup> – 1 month washout*

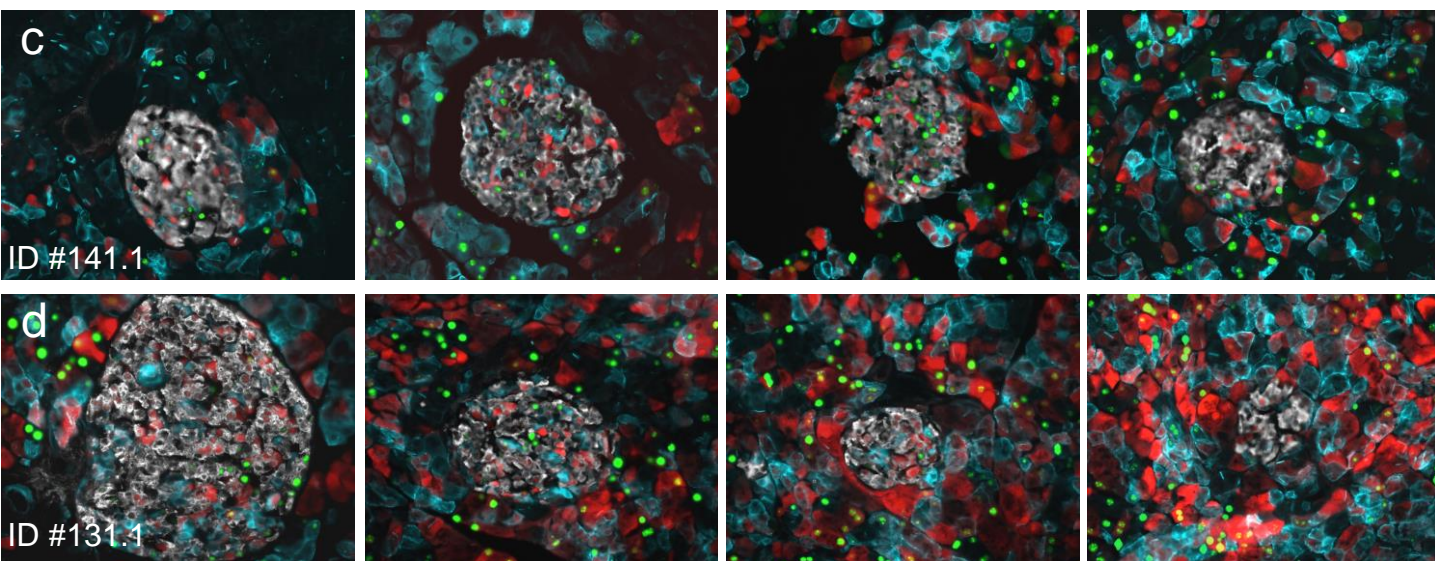

*Ubc Cre Rosa Brainbow2.1 LepR<sup>loxP/loxP</sup> – 6 months on a HFD*

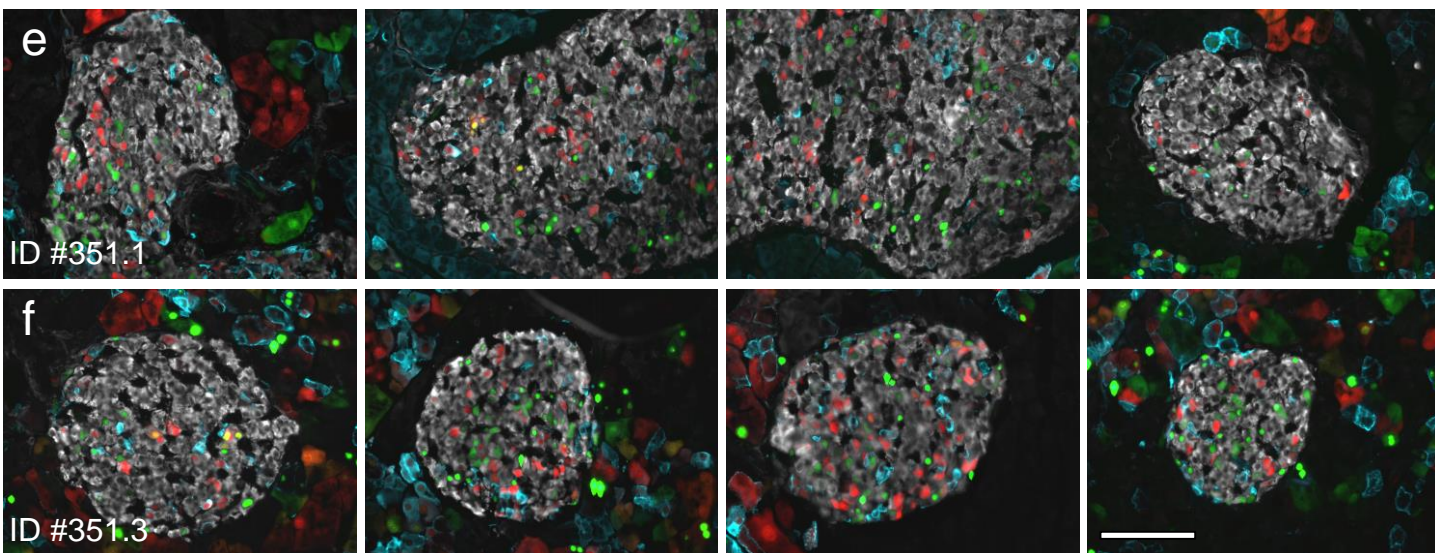

ESM Fig. 2. Representative images of Brainbow2.1 reporter labelling beta cells at various time points. Tamoxifen-induced recombination in *Ubc-Cre<sup>ERT2</sup> Rosa26<sup>(CAG-Brainbow2.1)</sup> LepR<sup>loxP/loxP</sup>* mice was performed and pancreata were harvested (a-b) on day 5, the last day of tamoxifen treatment, after (c-d) 1 month washout, and (e-f) 6 months washout on a high fat diet (HFD). Four representative images are shown per mouse, from two mice per cohort with their respective animal ID # indicated.
