# Supplementary material for: Extreme obesity induces massive beta cell expansion in mice through self-renewal and does not alter the beta cell lineage
Source: PubMed Central journal article supplement (PMC4869735; doi:10.1007/s00125-016-3922-7), 2016-03-22
Supplement: 125_2016_3922_MOESM3_ESM.pdf [file 125_2016_3922_MOESM3_ESM.pdf]

**ESM Table 1. Genotyping and qPCR primers (5' - 3').** Ubc Cre, LepR loxP/loxP, Rosa26 YFP, and Rosa26 confetti primers were used to genotype mice. InsR primers were used as a control gene for qPCR with LepR loxP/loxP primers

| Gene            | Forward                       | Reverse                        |                      |
|-----------------|-------------------------------|--------------------------------|----------------------|
| Ubc Cre         | CGCTCGGGTTGGCGAGTGTGTTTTGTGAA | GCCTGGCGATCCCTGAACATGTCCATCAGG |                      |
| LepR loxP/loxP  | GTTGTTTGAAGCTACAAGGCTGTATG    | GTACAGGTCTCTTTGCTAAACCTGAAG    |                      |
| InsR            | TCCACTTTAGAGTAACAGACTGAGGTT   | AAGTTAAGAGGGGAATGTGTGGAATAC    |                      |
| Gene            | Common                        | Wild Type                      | Mutant               |
| Rosa26 YFP      | AAAGTCGCTCTGAGTTGTTAT         | GGAGCGGGAGAAATGGATATG          | AAGACCGGAAGAGTTTGTC  |
| Rosa26 Confetti | CCAGATGACTACCTATCCTC          | AAAGTCGCTCTGAGTTGTTAT          | GAATTAATCCGGTAACTTCG |
