# Supplementary material for: Extreme obesity induces massive beta cell expansion in mice through self-renewal and does not alter the beta cell lineage
Source: PubMed Central journal article supplement (PMC4869735; doi:10.1007/s00125-016-3922-7), 2016-03-22
Supplement: 125_2016_3922_MOESM4_ESM.pdf [file 125_2016_3922_MOESM4_ESM.pdf]

**ESM Table 2. Individual physiologic data from LepR I<sup>fl/p</sup> and Ubc Cre LepR I<sup>fl/p</sup> mice.** Initial and final body weight (g), initial and final blood glucose (mmol/l), glucose tolerance test blood glucose measurements (mmol/l) after overnight fast (mmol/l) and at time 15, 30, 60, and 120 min followed by the area under the curve (AUC, mmol/l x min), random fed serum insulin (ng/ml), insulin tolerance test blood glucose measurements (mmol/l) after a 4 hour fast and at time 0, 15, 30, 45, and 60 min followed by the area under the curve (AUC; % initial blood glucose x min), gonadal fat weight (g). Measurements were made in three different cohorts of LepR I<sup>fl/p</sup> and Ubc Cre LepR I<sup>fl/p</sup> mice at 3 and 5 weeks after tamoxifen initiation.

|         |                                | Week 3    |     |      |                |              |                   |                   |                  |                    |                    |                    |                     |                    |                      |                          |                       |                   |                    |                    |                    |                    |                       |               |
|---------|--------------------------------|-----------|-----|------|----------------|--------------|-------------------|-------------------|------------------|--------------------|--------------------|--------------------|---------------------|--------------------|----------------------|--------------------------|-----------------------|-------------------|--------------------|--------------------|--------------------|--------------------|-----------------------|---------------|
|         | Group                          | ID Number | Sex | #    | Initial Wt (g) | Final Wt (g) | Init. BG (mmol/l) | Final BG (mmol/l) | Fast BG (mmol/l) | 15 min BG (mmol/l) | 30 min BG (mmol/l) | 60 min BG (mmol/l) | 120 min BG (mmol/l) | AUC (mmol/l x min) | Fed Insulin (pmol/l) | Fasting Insulin (pmol/l) | 4 hr Fast BG (mmol/l) | 0 min BG (mmol/l) | 15 min BG (mmol/l) | 30 min BG (mmol/l) | 45 min BG (mmol/l) | 60 min BG (mmol/l) | AUC (% initial x min) | Gonad Fat (g) |
|         |                                |           |     |      |                |              |                   |                   |                  |                    |                    |                    |                     |                    |                      |                          |                       |                   |                    |                    |                    |                    |                       |               |
| Control | LepR I <sup>fl/p</sup>         | 62.3      | M   | 1    | 21.2           | 21.4         | 8.4               | 6.0               | 3.3              | 12.6               | 11.8               | 9.7                | 5.3                 | 1076               | 62.5                 | 44.4                     | ND                    | ND                | ND                 | ND                 | ND                 | ND                 | ND                    | ND            |
|         | LepR I <sup>fl/p</sup>         | 63.2      | F   | 2    | 16.9           | 18.2         | 7.5               | 8.6               | 2.7              | 12.7               | 13.6               | 10.6               | 3.6                 | 1100               | ND                   | 73.2                     | ND                    | ND                | ND                 | ND                 | ND                 | ND                 | ND                    | ND            |
|         | LepR I <sup>fl/p</sup>         | 63.3      | F   | 3    | 19.3           | 19.2         | 7.7               | 6.9               | 2.7              | 10.6               | 11.3               | 9.0                | 4.1                 | 960                | 39.3                 | 54.4                     | ND                    | ND                | ND                 | ND                 | ND                 | ND                 | ND                    | ND            |
|         | LepR I <sup>fl/p</sup>         | 63.4      | F   | 4    | 18.4           | 18.3         | 6.9               | 6.9               | 2.4              | 13.2               | 13.2               | 8.9                | 4.2                 | 1038               | 56.8                 | 22.0                     | ND                    | ND                | ND                 | ND                 | ND                 | ND                 | ND                    | ND            |
|         | LepR I <sup>fl/p</sup>         | 64.3      | F   | 5    | 16.8           | 15.2         | 6.1               | 5.1               | 1.8              | 5.4                | 6.7                | 4.9                | 3.8                 | 581                | ND                   | 58.7                     | ND                    | ND                | ND                 | ND                 | ND                 | ND                 | ND                    | ND            |
|         | LepR I <sup>fl/p</sup>         | 22.2BI    | M   | 6    | 22.6           | 23.6         | 10.5              | 8.6               | 4.1              | 6.0                | 6.2                | 6.3                | 4.5                 | 678                | 318.9                | ND                       | 9.4                   | 10.0              | 5.2                | 3.4                | 2.0                | 1.8                | 4448                  | 279           |
|         | LepR I <sup>fl/p</sup>         | 24.4BI    | M   | 7    | 20.7           | 21.0         | 11.9              | 10.1              | 3.4              | 22.5               | 21.3               | 11.6               | 5.1                 | 1516               | 101.4                | 50.4                     | 10.4                  | 10.8              | 6.1                | 4.8                | 3.3                | 2.7                | 5663                  | 190           |
|         | LepR I <sup>fl/p</sup>         | 25.1BI    | M   | 8    | 19.4           | 20.5         | 11.3              | 9.2               | 6.3              | 27.7               | 22.1               | 13.1               | 7.2                 | 1765               | 136.4                | 24.3                     | 9.1                   | 12.0              | 4.6                | 4.6                | 2.7                | 2.3                | 5130                  | 92            |
|         | Average                        |           |     |      | 19.4           | 19.7         | 8.8               | 7.4               | 3.3              | 13.8               | 13.3               | 9.3                | 4.7                 | 1089.3             | 119.2                | 46.8                     | 9.6                   | 10.9              | 5.3                | 4.3                | 2.7                | 2.3                | 5080.3                | 187.0         |
|         | SEM                            |           |     |      | 0.7            | 0.9          | 0.8               | 0.6               | 0.5              | 2.7                | 2.1                | 0.9                | 0.4                 | 139.2              | 42.4                 | 7.0                      | 0.4                   | 0.6               | 0.5                | 0.4                | 0.4                | 0.4                | 0.3                   | 351.6         |
| LepR KO | Ubc Cre LepR I <sup>fl/p</sup> | 62.1      | M   | 1    | 20.5           | 33.7         | 10.9              | 9.8               | 4.9              | 20.7               | 22.4               | 13.3               | 5.9                 | 1625               | 291.0                | 91.6                     | ND                    | ND                | ND                 | ND                 | ND                 | ND                 | ND                    | ND            |
|         | Ubc Cre LepR I <sup>fl/p</sup> | 62.2      | M   | 2    | 20.8           | 27.1         | 9.2               | 7.9               | 3.1              | 9.2                | 10.6               | 6.8                | 6.2                 | 892                | 163.7                | 77.1                     | ND                    | ND                | ND                 | ND                 | ND                 | ND                 | ND                    | ND            |
|         | Ubc Cre LepR I <sup>fl/p</sup> | 63.1      | F   | 3    | 17.6           | 31.3         | 7.4               | 8.3               | 4.6              | 14.7               | 20.3               | 24.9               | 12.4                | 2203               | 197.1                | 76.8                     | ND                    | ND                | ND                 | ND                 | ND                 | ND                 | ND                    | ND            |
|         | Ubc Cre LepR I <sup>fl/p</sup> | 64.1      | F   | 4    | 17.3           | 32.9         | 7.7               | 10.3              | 4.3              | 17.9               | 26.6               | 21.9               | 13.3                | 2283               | 253.1                | 112.3                    | ND                    | ND                | ND                 | ND                 | ND                 | ND                 | ND                    | ND            |
|         | Ubc Cre LepR I <sup>fl/p</sup> | 64.2      | F   | 5    | 17.8           | 30.9         | 6.7               | 9.2               | 4.0              | 14.3               | 17.9               | 23.5               | 9.8                 | 2000               | 73.9                 | 43.2                     | ND                    | ND                | ND                 | ND                 | ND                 | ND                 | ND                    | ND            |
|         | Ubc Cre LepR I <sup>fl/p</sup> | 22.1BI    | M   | 6    | 22.4           | 35.0         | 11.3              | 7.3               | 8.6              | 17.0               | 18.2               | 15.8               | 9.9                 | 1692               | 353.7                | 615.0                    | 11.3                  | 12.2              | 12.5               | 7.1                | 6.1                | 8.7                | 9758                  | 1878          |
|         | Ubc Cre LepR I <sup>fl/p</sup> | 22.3BI    | M   | 7    | 21.5           | 39.0         | 8.2               | 10.3              | 6.2              | 14.1               | 15.3               | 12.5               | 8.4                 | 1418               | 477.3                | 490.0                    | 11.7                  | 14.4              | 13.1               | 7.5                | 7.8                | 9.0                | 10838                 | 2090          |
|         | Ubc Cre LepR I <sup>fl/p</sup> | 22.4BI    | M   | 8    | 22.5           | 34.9         | 8.9               | 10.2              | 6.7              | 13.9               | 15.1               | 13.3               | 8.8                 | 1464               | 1383.6               | 487.9                    | 13.6                  | 16.0              | 14.8               | 14.4               | 16.4               | 15.4               | 16553                 | 1877          |
|         | Ubc Cre LepR I <sup>fl/p</sup> | 22.5BI    | M   | 9    | 24.7           | 40.0         | 9.3               | 9.5               | 7.0              | 26.3               | HI                 | 23.6               | 18.9                | 2702               | 840.2                | 448.0                    | 11.3                  | 12.7              | 14.1               | 14.7               | 12.8               | 12.5               | 14618                 | 2163          |
|         | Ubc Cre LepR I <sup>fl/p</sup> | 24.1BI    | M   | 10   | 19.1           | 34.4         | 8.4               | 9.9               | 7.1              | HI                 | HI                 | 27.6               | 12.4                | 2710               | 1419.9               | 432.7                    | 9.1                   | 12.9              | 6.2                | 6.1                | 7.1                | 9.6                | 8273                  | 1678          |
|         | Ubc Cre LepR I <sup>fl/p</sup> | 24.2BI    | M   | 11   | 18.6           | 27.2         | 9.2               | 8.6               | 6.6              | 11.9               | 9.1                | 8.1                | 6.2                 | 979                | 439.7                | 193.9                    | 13.3                  | 13.5              | 9.7                | 11.3               | 12.2               | 9.2                | 12030                 | 1086          |
|         | Ubc Cre LepR I <sup>fl/p</sup> | 24.3BI    | M   | 12   | 19.7           | 32.6         | 12.0              | 10.6              | 5.5              | 22.2               | HI                 | HI                 | 14.3                | 2683               | 424.2                | 238.1                    | 13.1                  | 15.9              | 9.6                | 7.1                | 8.8                | 7.7                | 10073                 | 1777          |
| Average |                                |           |     | 20.2 | 33.3           | 9.1          | 9.3               | 5.7               | 16.6             | 17.0               | 17.4               | 10.6               | 1887.5              | 526.5              | 275.6                | 11.9                     | 13.9                  | 11.4              | 9.7                | 10.2               | 10.3               | 11734.7            | 1792.7                |               |
| SEM     |                                |           |     | 0.7  | 1.1            | 0.5          | 0.3               | 0.5               | 1.5              | 1.8                | 2.2                | 1.1                | 186.0               | 130.8              | 59.2                 | 0.6                      | 0.6                   | 1.2               | 1.4                | 1.4                | 1.0                | 1102.7             | 133.9                 |               |
| p-value |                                |           |     | 0.44 | 8.65E-08       | 0.70         | 0.007             | 0.003             | 0.003            | 0.36               | 0.19               | 0.008              | 0.0007              | 0.006              | 0.048                | 0.01                     | 0.046                 | 0.02              | 0.01               | 0.04               | 0.0098             | 0.001              | 0.005                 | 0.00007       |

|         |         | Week 5    |     |      |                |              |                   |                   |                  |                    |                    |                    |                     |                    |                      |                          |                       |                   |                    |                    |                    |                    |                       |               |
|---------|---------|-----------|-----|------|----------------|--------------|-------------------|-------------------|------------------|--------------------|--------------------|--------------------|---------------------|--------------------|----------------------|--------------------------|-----------------------|-------------------|--------------------|--------------------|--------------------|--------------------|-----------------------|---------------|
|         | Group   | ID Number | Sex | #    | Initial Wt (g) | Final Wt (g) | Init. BG (mmol/l) | Final BG (mmol/l) | Fast BG (mmol/l) | 15 min BG (mmol/l) | 30 min BG (mmol/l) | 60 min BG (mmol/l) | 120 min BG (mmol/l) | AUC (mmol/l x min) | Fed Insulin (pmol/l) | Fasting Insulin (pmol/l) | 4 hr Fast BG (mmol/l) | 0 min BG (mmol/l) | 15 min BG (mmol/l) | 30 min BG (mmol/l) | 45 min BG (mmol/l) | 60 min BG (mmol/l) | AUC (% initial x min) | Gonad Fat (g) |
|         |         |           |     |      |                |              |                   |                   |                  |                    |                    |                    |                     |                    |                      |                          |                       |                   |                    |                    |                    |                    |                       |               |
| Control | B6.129  | 974.2     | F   | 1    | 14.4           | 17.0         | 7.6               | 7.6               | 2.4              | 20.9               | 23.8               | 9.1                | 4.1                 | 1397               | 127.9                | 71.8                     | ND                    | ND                | ND                 | ND                 | ND                 | ND                 | ND                    |               |
|         | B6.129  | 980.1     | F   | 2    | 19.7           | 19.4         | 6.4               | 7.7               | 2.4              | 14.8               | 9.8                | 7.2                | 4.5                 | 922                | 114.5                | 79.4                     | ND                    | ND                | ND                 | ND                 | ND                 | ND                 | ND                    |               |
|         | B6.129  | 980.2     | F   | 3    | 17.9           | 17.9         | 7.0               | 6.2               | 2.4              | 12.4               | 10.6               | 6.9                | 3.6                 | 864                | 204.2                | 54.8                     | ND                    | ND                | ND                 | ND                 | ND                 | ND                 | ND                    |               |
|         | B6.129  | 980.3     | F   | 4    | 18.4           | 17.2         | 7.6               | 6.1               | 2.1              | 21.3               | 18.3               | 10.1               | 4.8                 | 1346               | 95.2                 | 57.3                     | ND                    | ND                | ND                 | ND                 | ND                 | ND                 | ND                    |               |
|         | B6.129  | 981.2     | F   | 5    | 16.6           | 18.1         | 4.7               | 7.2               | 2.3              | 24.2               | 14.2               | 7.8                | 4.2                 | 1370               | 55.3                 | 133.6                    | ND                    | ND                | ND                 | ND                 | ND                 | ND                 | ND                    |               |
|         | B6.129  | 981.4     | F   | 6    | 17.1           | 16.6         | 6.0               | 6.8               | 3.1              | 17.8               | 15.3               | 12.9               | 5.2                 | 1178               | 71.3                 | 364.3                    | ND                    | ND                | ND                 | ND                 | ND                 | ND                 | ND                    | ND            |
| Average |         |           |     | 17.3 | 17.7           | 6.5          | 6.9               | 2.4               | 18.6             | 15.4               | 9.0                | 4.4                | 1179.5              | 111.4              | 126.9                |                          |                       |                   |                    |                    |                    |                    |                       |               |
| SEM     |         |           |     | 0.7  | 0.4            | 0.5          | 0.3               | 0.1               | 1.8              | 2.1                | 0.9                | 0.2                | 96.0                | 21.5               | 48.9                 |                          |                       |                   |                    |                    |                    |                    |                       |               |
| LepR KO | B6.129  | 974.1     | F   | 1    | 14.8           | 40.9         | 5.8               | 8.6               | 4.8              | 20.3               | 21.2               | HI                 | HI                  | 2901               | 1105.0               | 526.9                    | ND                    | ND                | ND                 | ND                 | ND                 | ND                 | ND                    |               |
|         | B6.129  | 974.4     | F   | 2    | 17.7           | 41.7         | 6.6               | 7.8               | 3.4              | 25.9               | HI                 | HI                 | 23.8                | 3003               | 691.3                | 390.5                    | ND                    | ND                | ND                 | ND                 | ND                 | ND                 | ND                    |               |
|         | B6.129  | 974.5     | F   | 3    | 15.4           | 38.0         | 7.6               | 7.4               | 3.8              | 10.2               | 12.8               | 24.7               | HI                  | 2413               | 979.2                | 420.3                    | ND                    | ND                | ND                 | ND                 | ND                 | ND                 | ND                    |               |
|         | B6.129  | 978.1     | F   | 4    | 17.4           | 40.5         | 5.6               | 6.8               | 4.2              | 25.9               | HI                 | HI                 | HI                  | 3129               | 1623.8               | 405.5                    | ND                    | ND                | ND                 | ND                 | ND                 | ND                 | ND                    |               |
|         | B6.129  | 978.5     | F   | 5    | 16.7           | 45.5         | 5.2               | 6.3               | 4.1              | 14.6               | HI                 | HI                 | HI                  | 2958               | 735.4                | 247.4                    | ND                    | ND                | ND                 | ND                 | ND                 | ND                 | ND                    |               |
|         | B6.129  | 981.1     | F   | 6    | 18.0           | 42.1         | 4.8               | 5.4               | 3.9              | 19.5               | 20.2               | 9.1                | 4.4                 | 1320               | 691.5                | 851.9                    | ND                    | ND                | ND                 | ND                 | ND                 | ND                 | ND                    |               |
|         | B6.129  | 981.3     | F   | 7    | 19.4           | 43.5         | 5.4               | 9.1               | 4.2              | 26.2               | HI                 | HI                 | HI                  | 23.3               | 2997                 | 800.3                    | 575.1                 | ND                | ND                 | ND                 | ND                 | ND                 | ND                    |               |
|         | Average |           |     |      | 17.1           | 41.7         | 5.8               | 7.3               | 4.1              | 20.4               | 18.1               | 16.9               | 17.2                | 2674.4             | 946.6                | 486.2                    |                       |                   |                    |                    |                    |                    |                       |               |
|         | SEM     |           |     |      | 0.6            | 0.9          | 0.4               | 0.5               | 0.2              | 2.4                | 2.6                | 7.8                | 6.4                 | 241.7              | 127.3                | 72.4                     |                       |                   |                    |                    |                    |                    |                       |               |
|         | p-value |           |     |      | 0.76           | 1.16E-10     | 0.24              | 0.49              | 0.00001          | 0.57               | 0.47               | 0.10               | 0.02                | 0.0002             | 0.00009              | 0.002                    |                       |                   |                    |                    |                    |                    |                       |               |
