# Supplementary material for: Extreme obesity induces massive beta cell expansion in mice through self-renewal and does not alter the beta cell lineage
Source: PubMed Central journal article supplement (PMC4869735; doi:10.1007/s00125-016-3922-7), 2016-03-22
Supplement: 125_2016_3922_MOESM5_ESM.pdf [file 125_2016_3922_MOESM5_ESM.pdf]

**ESM Table 3. Breakdown of sexes for experiments performed in Figure 1.**  
 Control and LepR KO groups divided by sex with the sample number (n-value) for each experiment listed. For figure l & j, values are listed as week 3, week 5.

|           | Control (n-value) |         | LepR KO (n-value) |         |
|-----------|-------------------|---------|-------------------|---------|
|           | Males             | Females | Males             | Females |
| Figure 1b | 0                 | 7       | 0                 | 7       |
| Figure 1c | 0                 | 7       | 0                 | 7       |
| Figure 1d | 0                 | 6       | 0                 | 6       |
| Figure 1e | 1                 | 4       | 2                 | 3       |
| Figure 1f | 0                 | 7       | 0                 | 7       |
| Figure 1g | 3                 | 0       | 7                 | 0       |
| Figure 1h | 3                 | 0       | 7                 | 0       |
| Figure 1i | 3, 0              | 4, 6    | 9, 0              | 3, 7    |
| Figure 1j | 4, 0              | 2, 6    | 9, 0              | 3, 7    |
| Figure 1k | 3                 | 0       | 3                 | 0       |
| Figure 1l | 3                 | 0       | 3                 | 0       |
| Figure 1m | 3                 | 0       | 3                 | 0       |
| Figure 1n | 3                 | 0       | 3                 | 0       |
| Figure 1o | 3                 | 0       | 0                 | 3       |
| Figure 1p | 3                 | 0       | 0                 | 3       |
| Figure 1q | 3                 | 0       | 0                 | 3       |
