# Supplementary material for: Extreme obesity induces massive beta cell expansion in mice through self-renewal and does not alter the beta cell lineage
Source: PubMed Central journal article supplement (PMC4869735; doi:10.1007/s00125-016-3922-7), 2016-03-22
Supplement: 125_2016_3922_MOESM6_ESM.pdf [file 125_2016_3922_MOESM6_ESM.pdf]

**ESM Table 4. Individual morphometric data from LepR<sup>flp</sup> and Ubc Cre LepR<sup>flp</sup> mice. Pancreas mass (g), total number of slides and tissue sections analyzed, pancreas and insulin area (mm<sup>2</sup>), beta cell area (% of total pancreas area), and beta cell mass (mg) for the head, tail, and total pancreas. Measurements were made in three different cohorts of LepR<sup>flp</sup> and Ubc Cre LepR<sup>flp</sup> mice at 3 and 5 weeks after tamoxifen initiation.**

|                             |                             | Week 3                      |       |       |                    |                           |                           |                                  |                                 |                          |                     |                    |                           |                           |                                  |                                 |                          |                     |                    |                           |                           |                                  |                                 |                          |                     |      |
|-----------------------------|-----------------------------|-----------------------------|-------|-------|--------------------|---------------------------|---------------------------|----------------------------------|---------------------------------|--------------------------|---------------------|--------------------|---------------------------|---------------------------|----------------------------------|---------------------------------|--------------------------|---------------------|--------------------|---------------------------|---------------------------|----------------------------------|---------------------------------|--------------------------|---------------------|------|
|                             | Group                       | ID Number                   | Sex   | #     | Head Pancreas      |                           |                           |                                  |                                 |                          | Tail Pancreas       |                    |                           |                           |                                  |                                 | Total Pancreas           |                     |                    |                           |                           |                                  |                                 |                          |                     |      |
|                             |                             |                             |       |       | Pancreas Mass (mg) | Number of Slides Analyzed | Number of Depths Analyzed | Pancreas Area (mm <sup>2</sup> ) | Insulin Area (mm <sup>2</sup> ) | Beta Cell Area (% Total) | Beta Cell Mass (mg) | Pancreas Mass (mg) | Number of Slides Analyzed | Number of Depths Analyzed | Pancreas Area (mm <sup>2</sup> ) | Insulin Area (mm <sup>2</sup> ) | Beta Cell Area (% Total) | Beta Cell Mass (mg) | Pancreas Mass (mg) | Number of Slides Analyzed | Number of Depths Analyzed | Pancreas Area (mm <sup>2</sup> ) | Insulin Area (mm <sup>2</sup> ) | Beta Cell Area (% Total) | Beta Cell Mass (mg) |      |
| Control                     | LepR <sup>flp</sup>         | 63.2Bl                      | F     | 1     | 88                 | 2                         | 10                        | 145.1                            | 0.78                            | 0.54                     | 0.47                | 92                 | 2                         | 8                         | 166.5                            | 1.21                            | 0.73                     | 0.67                | 180                | 4                         | 18                        | 311.5                            | 1.99                            | 0.84                     | 1.15                |      |
|                             | LepR <sup>flp</sup>         | 63.3Bl                      | F     | 2     | 121                | 2                         | 7                         | 150.9                            | 1.06                            | 0.70                     | 0.85                | 100                | 2                         | 8                         | 157.8                            | 1.03                            | 0.65                     | 0.65                | 221                | 4                         | 15                        | 308.7                            | 2.09                            | 0.68                     | 1.50                |      |
|                             | LepR <sup>flp</sup>         | 63.4Bl                      | F     | 3     | 65                 | 2                         | 7                         | 105.7                            | 0.48                            | 0.45                     | 0.30                | 90                 | 2                         | 7                         | 150.4                            | 0.65                            | 0.43                     | 0.39                | 155                | 4                         | 14                        | 256.1                            | 1.13                            | 0.44                     | 0.68                |      |
|                             | LepR <sup>flp</sup>         | 64.3Bl                      | F     | 4     | 58                 | 2                         | 7                         | 88.7                             | 0.54                            | 0.61                     | 0.35                | 69                 | 2                         | 8                         | 120.0                            | 0.80                            | 0.67                     | 0.46                | 127                | 4                         | 15                        | 208.7                            | 1.34                            | 0.64                     | 0.81                |      |
|                             | LepR <sup>flp</sup>         | 62.9Bl                      | M     | 5     | 111                | 2                         | 7                         | 182.3                            | 0.49                            | 0.27                     | 0.30                | 117                | 2                         | 8                         | 188.7                            | 1.27                            | 0.67                     | 0.79                | 228                | 4                         | 15                        | 371.0                            | 1.76                            | 0.47                     | 1.08                |      |
|                             | LepR <sup>flp</sup>         | 22.2Bl                      | M     | 6     | 85                 | 2                         | 7                         | 177.9                            | 1.09                            | 0.61                     | 0.52                | 130                | 2                         | 8                         | 314.2                            | 1.55                            | 0.49                     | 0.64                | 215                | 4                         | 15                        | 492.1                            | 2.64                            | 0.54                     | 1.15                |      |
|                             | LepR <sup>flp</sup>         | 24.4Bl                      | M     | 7     | 93                 | 2                         | 8                         | 176.6                            | 0.53                            | 0.30                     | 0.28                | 143                | 2                         | 8                         | 293.5                            | 1.35                            | 0.46                     | 0.66                | 236                | 4                         | 16                        | 469.1                            | 1.88                            | 0.40                     | 0.95                |      |
|                             | LepR <sup>flp</sup>         | 25.1Bl                      | M     | 8     | 74                 | 2                         | 8                         | 166.4                            | 0.59                            | 0.36                     | 0.26                | 117                | 2                         | 8                         | 317.8                            | 1.81                            | 0.57                     | 0.66                | 191                | 4                         | 16                        | 484.2                            | 2.40                            | 0.50                     | 0.95                |      |
|                             | Average                     |                             |       |       | 86.9               | 2.0                       | 7.6                       | 149.1                            | 0.70                            | 0.48                     | 0.42                | 107.3              | 2.0                       | 7.9                       | 213.6                            | 1.21                            | 0.58                     | 0.61                | 194.1              | 4.0                       | 15.5                      | 362.7                            | 1.90                            | 0.54                     | 1.05                |      |
|                             | SEM                         |                             |       |       | 7.6                |                           |                           | 12.3                             | 0.09                            | 0.06                     | 0.07                | 8.5                |                           |                           | 28.7                             | 0.13                            | 0.04                     | 0.05                | 13.6               |                           |                           | 38.6                             | 0.18                            | 0.04                     | 0.09                |      |
| LepR <sup>KO</sup>          | Ubc Cre LepR <sup>flp</sup> | 63.1Bl                      | F     | 1     | 72                 | 2                         | 9                         | 145.4                            | 1.79                            | 1.23                     | 0.89                | 95                 | 2                         | 7                         | 138.7                            | 1.57                            | 1.13                     | 1.08                | 167                | 4                         | 16                        | 284.0                            | 3.36                            | 1.18                     | 1.98                |      |
|                             | Ubc Cre LepR <sup>flp</sup> | 64.1Bl                      | F     | 2     | 80                 | 2                         | 7                         | 171.0                            | 1.49                            | 0.87                     | 0.70                | 111                | 2                         | 10                        | 201.7                            | 3.52                            | 1.75                     | 1.94                | 191                | 4                         | 17                        | 372.8                            | 5.01                            | 1.34                     | 2.57                |      |
|                             | Ubc Cre LepR <sup>flp</sup> | 64.2Bl                      | F     | 3     | 101                | 2                         | 7                         | 194.4                            | 1.39                            | 0.71                     | 0.72                | 115                | 2                         | 10                        | 184.7                            | 2.01                            | 1.09                     | 1.25                | 216                | 4                         | 17                        | 379.2                            | 3.40                            | 0.90                     | 1.94                |      |
|                             | Ubc Cre LepR <sup>flp</sup> | 62.1Bl                      | M     | 4     | 110                | 2                         | 7                         | 127.6                            | 1.07                            | 0.84                     | 0.92                | 131                | 2                         | 7                         | 185.6                            | 1.83                            | 0.99                     | 1.29                | 241                | 4                         | 14                        | 313.2                            | 2.90                            | 0.93                     | 2.23                |      |
|                             | Ubc Cre LepR <sup>flp</sup> | 62.2Bl                      | M     | 5     | 94                 | 2                         | 9                         | 193.5                            | 1.58                            | 0.82                     | 0.77                | 119                | 2                         | 8                         | 181.7                            | 1.73                            | 0.95                     | 1.13                | 213                | 4                         | 17                        | 375.2                            | 3.31                            | 0.88                     | 1.88                |      |
|                             | Ubc Cre LepR <sup>flp</sup> | 22.1Bl                      | M     | 6     | 133                | 2                         | 8                         | 259.6                            | 1.89                            | 0.73                     | 0.97                | 165                | 2                         | 8                         | 356.7                            | 3.24                            | 0.91                     | 1.50                | 298                | 4                         | 16                        | 616.3                            | 5.13                            | 0.83                     | 2.48                |      |
|                             | Ubc Cre LepR <sup>flp</sup> | 22.3Bl                      | M     | 7     | 116                | 2                         | 8                         | 227.9                            | 1.42                            | 0.62                     | 0.72                | 138                | 2                         | 8                         | 350.7                            | 4.29                            | 1.22                     | 1.69                | 254                | 4                         | 16                        | 578.6                            | 5.71                            | 0.99                     | 2.51                |      |
|                             | Ubc Cre LepR <sup>flp</sup> | 22.4Bl                      | M     | 8     | 114                | 2                         | 8                         | 255.8                            | 1.55                            | 0.61                     | 0.69                | 137                | 2                         | 8                         | 298.9                            | 3.26                            | 1.09                     | 1.49                | 251                | 4                         | 16                        | 554.6                            | 4.81                            | 0.87                     | 2.18                |      |
|                             | Ubc Cre LepR <sup>flp</sup> | 22.5Bl                      | M     | 9     | 140                | 2                         | 8                         | 307.8                            | 2.92                            | 0.95                     | 1.33                | 149                | 2                         | 8                         | 369.1                            | 3.97                            | 1.08                     | 1.60                | 289                | 4                         | 16                        | 676.9                            | 6.89                            | 1.02                     | 2.94                |      |
|                             | Ubc Cre LepR <sup>flp</sup> | 24.1Bl                      | M     | 10    | ND                 | ND                        | ND                        | ND                               | ND                              | ND                       | ND                  | ND                 | ND                        | ND                        | ND                               | ND                              | ND                       | ND                  | ND                 | ND                        | ND                        | ND                               | ND                              | ND                       | ND                  | ND   |
|                             | Ubc Cre LepR <sup>flp</sup> | 24.2Bl                      | M     | 11    | ND                 | ND                        | ND                        | ND                               | ND                              | ND                       | ND                  | ND                 | ND                        | ND                        | ND                               | ND                              | ND                       | ND                  | ND                 | ND                        | ND                        | ND                               | ND                              | ND                       | ND                  | ND   |
|                             | Ubc Cre LepR <sup>flp</sup> | 24.3Bl                      | M     | 12    | ND                 | ND                        | ND                        | ND                               | ND                              | ND                       | ND                  | ND                 | ND                        | ND                        | ND                               | ND                              | ND                       | ND                  | ND                 | ND                        | ND                        | ND                               | ND                              | ND                       | ND                  | ND   |
| Average                     |                             |                             |       | 106.7 | 2.0                | 7.9                       | 209.2                     | 1.68                             | 0.82                            | 0.86                     | 128.9               | 2.0                | 8.2                       | 252.0                     | 2.82                             | 1.13                            | 1.44                     | 235.6               | 4.0                | 16.1                      | 461.2                     | 4.50                             | 0.99                            | 2.30                     |                     |      |
| SEM                         |                             |                             |       | 7.5   |                    |                           | 19.5                      | 0.17                             | 0.06                            | 0.07                     | 7.1                 |                    |                           | 30.2                      | 0.35                             | 0.08                            | 0.09                     | 14.4                |                    |                           | 48.4                      | 0.45                             | 0.06                            | 0.12                     |                     |      |
| p-value                     |                             |                             |       | 0.09  |                    |                           | 0.02                      | 0.0002                           | 0.001                           | 0.0005                   | 0.07                |                    |                           | 0.38                      | 0.001                            | 3.88E-05                        | 1.48E-06                 | 0.055               |                    |                           | 0.14                      | 0.0001                           | 8.49E-06                        | 4.34E-07                 |                     |      |
|                             |                             | Week 5                      |       |       |                    |                           |                           |                                  |                                 |                          |                     |                    |                           |                           |                                  |                                 |                          |                     |                    |                           |                           |                                  |                                 |                          |                     |      |
|                             | Group                       | ID Number                   | Sex   | #     | Head Pancreas      |                           |                           |                                  |                                 |                          | Tail Pancreas       |                    |                           |                           |                                  |                                 | Total Pancreas           |                     |                    |                           |                           |                                  |                                 |                          |                     |      |
|                             |                             |                             |       |       | Pancreas Mass (mg) | Number of Slides Analyzed | Number of Depths Analyzed | Pancreas Area (mm <sup>2</sup> ) | Insulin Area (mm <sup>2</sup> ) | Beta Cell Area (% Total) | Beta Cell Mass (mg) | Pancreas Mass (mg) | Number of Slides Analyzed | Number of Depths Analyzed | Pancreas Area (mm <sup>2</sup> ) | Insulin Area (mm <sup>2</sup> ) | Beta Cell Area (% Total) | Beta Cell Mass (mg) | Pancreas Mass (mg) | Number of Slides Analyzed | Number of Depths Analyzed | Pancreas Area (mm <sup>2</sup> ) | Insulin Area (mm <sup>2</sup> ) | Beta Cell Area (% Total) | Beta Cell Mass (mg) |      |
| Control                     | LepR <sup>flp</sup>         | 974.2                       | F     | 1     | 84                 | 2                         | 6                         | 71.9                             | 0.40                            | 0.56                     | 0.47                | 80                 | 2                         | 6                         | 103.9                            | 1.11                            | 1.07                     | 0.85                | 164                | 4                         | 12                        | 175.8                            | 1.51                            | 0.86                     | 1.41                |      |
|                             | LepR <sup>flp</sup>         | 980.1                       | F     | 3     | 68                 | 2                         | 10                        | 149.8                            | 0.54                            | 0.36                     | 0.25                | 68                 | 2                         | 7                         | 138.2                            | 0.81                            | 0.59                     | 0.40                | 136                | 4                         | 17                        | 288.0                            | 1.35                            | 0.47                     | 0.64                |      |
|                             | LepR <sup>flp</sup>         | 980.2                       | F     | 4     | 54                 | 2                         | 10                        | 134.4                            | 0.42                            | 0.31                     | 0.17                | 75                 | 2                         | 10                        | 186.7                            | 1.12                            | 0.60                     | 0.45                | 129                | 4                         | 20                        | 321.1                            | 1.54                            | 0.48                     | 0.62                |      |
|                             | LepR <sup>flp</sup>         | 980.3                       | F     | 5     | 53                 | 2                         | 6                         | 115.1                            | 0.51                            | 0.44                     | 0.23                | 70                 | 2                         | 8                         | 144.6                            | 0.93                            | 0.64                     | 0.45                | 123                | 4                         | 14                        | 259.7                            | 1.44                            | 0.56                     | 0.68                |      |
|                             | LepR <sup>flp</sup>         | 981.2                       | F     | 6     | 70                 | 2                         | 8                         | 152.5                            | 0.49                            | 0.32                     | 0.22                | 79                 | 2                         | 10                        | 174.7                            | 1.13                            | 0.65                     | 0.51                | 149                | 4                         | 18                        | 327.3                            | 1.62                            | 0.50                     | 0.74                |      |
|                             | LepR <sup>flp</sup>         | 981.4                       | F     | 7     | 66                 | 2                         | 7                         | 141.2                            | 0.63                            | 0.45                     | 0.29                | 81                 | 2                         | 10                        | 217.0                            | 1.47                            | 0.68                     | 0.55                | 147                | 4                         | 17                        | 358.2                            | 2.10                            | 0.59                     | 0.86                |      |
|                             | Average                     |                             |       |       | 65.8               | 2.0                       | 7.8                       | 127.5                            | 0.50                            | 0.41                     | 0.27                | 75.5               | 2.0                       | 8.5                       | 160.9                            | 1.10                            | 0.70                     | 0.54                | 141.3              | 4.0                       | 16.3                      | 288.3                            | 1.60                            | 0.57                     | 0.83                |      |
|                             | SEM                         |                             |       |       | 4.7                |                           |                           | 12.4                             | 0.03                            | 0.04                     | 0.04                | 2.2                |                           |                           | 16.4                             | 0.09                            | 0.07                     | 0.07                | 6.1                |                           |                           | 26.4                             | 0.11                            | 0.06                     | 0.12                |      |
|                             | LepR <sup>KO</sup>          | Ubc Cre LepR <sup>flp</sup> | 974.1 | F     | 1                  | 52                        | 2                         | 4                                | 77.0                            | 1.16                     | 1.51                | 0.78               | 81                        | 2                         | 6                                | 127.6                           | 3.30                     | 2.59                | 2.10               | 133                       | 4                         | 10                               | 204.5                           | 4.46                     | 2.18                | 2.90 |
|                             |                             | Ubc Cre LepR <sup>flp</sup> | 974.4 | F     | 2                  | 86                        | 2                         | 6                                | 128.5                           | 1.95                     | 1.52                | 1.31               | 99                        | 2                         | 6                                | 116.1                           | 3.04                     | 2.62                | 2.59               | 185                       | 4                         | 12                               | 244.6                           | 4.99                     | 2.04                | 3.77 |
| Ubc Cre LepR <sup>flp</sup> |                             | 974.5                       | F     | 3     | 79                 | 2                         | 6                         | 103.7                            | 1.30                            | 1.25                     | 0.99                | 85                 | 2                         | 6                         | 72.9                             | 1.13                            | 1.55                     | 1.32                | 164                | 4                         | 12                        | 176.6                            | 2.43                            | 1.38                     | 2.26                |      |
| Ubc Cre LepR <sup>flp</sup> |                             | 978.1                       | F     | 4     | 88                 | 2                         | 5                         | 105.2                            | 1.35                            | 1.28                     | 1.10                | 117                | 2                         | 6                         | 109.6                            | 2.68                            | 2.45                     | 2.87                | 203                | 4                         | 11                        | 214.8                            | 4.03                            | 1.88                     | 3.81                |      |
| Ubc Cre LepR <sup>flp</sup> |                             | 978.5                       | F     | 5     | 75                 | 2                         | 6                         | 135.3                            | 2.23                            | 1.65                     | 1.24                | 112                | 2                         | 6                         | 152.0                            | 2.43                            | 1.60                     | 1.79                | 187                | 4                         | 12                        | 287.3                            | 4.66                            | 1.62                     | 3.03                |      |
| Ubc Cre LepR <sup>flp</sup> |                             | 981.1                       | F     | 6     | 94                 | 2                         | 8                         | 178.2                            | 1.99                            | 1.12                     | 1.05                | 112                | 2                         | 8                         | 247.6                            | 4.41                            | 1.78                     | 1.99                | 206                | 4                         | 16                        | 425.8                            | 6.40                            | 1.50                     | 3.10                |      |
| Ubc Cre LepR <sup>flp</sup> |                             | 981.3                       | F     | 7     | 79                 | 2                         | 8                         | 139.6                            | 1.64                            | 1.17                     | 0.93                | 113                | 2                         | 6                         | 162.3                            | 2.70                            | 1.66                     | 1.88                | 192                | 4                         | 14                        | 301.9                            | 4.34                            | 1.44                     | 2.76                |      |
| Average                     |                             |                             |       |       | 78.7               | 2.0                       | 6.1                       | 123.9                            | 1.66                            | 1.36                     | 1.06                | 102.7              | 2.0                       | 6.3                       | 141.1                            | 2.81                            | 2.04                     | 2.08                | 181.4              | 4.0                       | 12.4                      | 265.1                            | 4.47                            | 1.72                     | 3.09                |      |
| SEM                         |                             |                             |       |       | 5.0                |                           |                           | 12.3                             | 0.15                            | 0.08                     | 0.07                | 5.5                |                           |                           | 20.9                             | 0.37                            | 0.19                     | 0.19                | 9.6                |                           |                           | 31.7                             | 0.45                            | 0.12                     | 0.21                |      |
| p-value                     |                             |                             |       |       | 0.09               |                           |                           | 0.84                             | 2.85E-05                        | 3.98E-07                 | 1.31E-06            | 0.001              |                           |                           | 0.48                             | 0.0016                          | 6.31E-05                 | 2.34E-05            | 0.006              |                           |                           | 0.59                             | 0.0001                          | 5.57E-06                 | 2.22E-06            |      |
