# Supplementary material for: Extreme obesity induces massive beta cell expansion in mice through self-renewal and does not alter the beta cell lineage
Source: PubMed Central journal article supplement (PMC4869735; doi:10.1007/s00125-016-3922-7), 2016-03-22
Supplement: 125_2016_3922_MOESM7_ESM.pdf [file 125_2016_3922_MOESM7_ESM.pdf]

**ESM Table 5. Individual morphometric data from LepR Iplp and Ubc Cre LepR Iplp mice.** Beta cell size ( $\mu\text{m}^2$ ), cross-sectional beta cell area per islet ( $\mu\text{m}^2$ ), total islet number, and the number of islets within each size category. Measurements were made in three different cohorts of LepR Iplp and Ubc Cre LepR Iplp mice at 3 and 5 weeks after tamoxifen initiation.

|         |                   | <b>Week 3</b>        |   |                                    |                                                              |                    |                                                    |                             |                              |                        |                                    |                                                              |                    |                                                    |                             |                              |                        |                                    |                                                              |                    |                                                    |                             |                              |                        |      |
|---------|-------------------|----------------------|---|------------------------------------|--------------------------------------------------------------|--------------------|----------------------------------------------------|-----------------------------|------------------------------|------------------------|------------------------------------|--------------------------------------------------------------|--------------------|----------------------------------------------------|-----------------------------|------------------------------|------------------------|------------------------------------|--------------------------------------------------------------|--------------------|----------------------------------------------------|-----------------------------|------------------------------|------------------------|------|
|         |                   | <b>Head Pancreas</b> |   |                                    |                                                              |                    |                                                    |                             |                              | <b>Tail Pancreas</b>   |                                    |                                                              |                    |                                                    |                             |                              |                        | <b>Total Pancreas</b>              |                                                              |                    |                                                    |                             |                              |                        |      |
| Group   | ID Number         | Sex                  | # | Beta Cell Size ( $\mu\text{m}^2$ ) | Cross-sectional Beta Cell Area per Islet ( $\mu\text{m}^2$ ) | Total Islet Number | Number of Islet per Islet Size ( $\mu\text{m}^2$ ) |                             |                              |                        | Beta Cell Size ( $\mu\text{m}^2$ ) | Cross-sectional Beta Cell Area per Islet ( $\mu\text{m}^2$ ) | Total Islet Number | Number of Islet per Islet Size ( $\mu\text{m}^2$ ) |                             |                              |                        | Beta Cell Size ( $\mu\text{m}^2$ ) | Cross-sectional Beta Cell Area per Islet ( $\mu\text{m}^2$ ) | Total Islet Number | Number of Islet per Islet Size ( $\mu\text{m}^2$ ) |                             |                              |                        |      |
|         |                   |                      |   |                                    |                                                              |                    | <1000 $\mu\text{m}^2$                              | 1001 - 5000 $\mu\text{m}^2$ | 5001 - 10000 $\mu\text{m}^2$ | >10000 $\mu\text{m}^2$ |                                    |                                                              |                    | <1000 $\mu\text{m}^2$                              | 1001 - 5000 $\mu\text{m}^2$ | 5001 - 10000 $\mu\text{m}^2$ | >10000 $\mu\text{m}^2$ |                                    |                                                              |                    | <1000 $\mu\text{m}^2$                              | 1001 - 5000 $\mu\text{m}^2$ | 5001 - 10000 $\mu\text{m}^2$ | >10000 $\mu\text{m}^2$ |      |
| Control | LepR Iplp         | 63.2B1               | F | 1                                  | 146.1                                                        | 1511.1             | 325                                                | 234                         | 70                           | 13                     | 8                                  | 133.8                                                        | 2983.5             | 424                                                | 276                         | 84                           | 26                     | 38                                 | 138.5                                                        | 2344.6             | 749                                                | 510.0                       | 154.00                       | 39                     | 46   |
|         | LepR Iplp         | 63.3B1               | F | 2                                  | 152.2                                                        | 1571.0             | 499                                                | 384                         | 74                           | 18                     | 23                                 | 166.0                                                        | 2048.6             | 591                                                | 428                         | 109                          | 24                     | 30                                 | 159.8                                                        | 1830.0             | 1090                                               | 812                         | 183                          | 42                     | 53   |
|         | LepR Iplp         | 63.4B1               | F | 3                                  | 117.1                                                        | 1611.0             | 655                                                | 513                         | 101                          | 16                     | 25                                 | 142.7                                                        | 1626.7             | 724                                                | 550                         | 114                          | 32                     | 28                                 | 130.2                                                        | 1619.3             | 1379                                               | 1063                        | 215                          | 48                     | 53   |
|         | LepR Iplp         | 64.3B1               | F | 4                                  | 116.4                                                        | 1971.5             | 243                                                | 170                         | 47                           | 13                     | 13                                 | 147.8                                                        | 2084.4             | 310                                                | 200                         | 71                           | 24                     | 15                                 | 133.3                                                        | 2334.8             | 553                                                | 370                         | 118                          | 37                     | 28   |
|         | LepR Iplp         | 62.3B1               | M | 5                                  | 122.1                                                        | 1915.8             | 282                                                | 199                         | 62                           | 5                      | 16                                 | 170.0                                                        | 2103.8             | 380                                                | 274                         | 65                           | 24                     | 17                                 | 147.0                                                        | 2023.7             | 662                                                | 473                         | 127                          | 29                     | 33   |
|         | LepR Iplp         | 22.2B1               | M | 6                                  | 122.1                                                        | 3421.0             | 319                                                | 196                         | 67                           | 23                     | 33                                 | 125.1                                                        | 2656.5             | 582                                                | 409                         | 108                          | 22                     | 43                                 | 124.0                                                        | 2927.2             | 901                                                | 605                         | 175                          | 45                     | 76   |
|         | LepR Iplp         | 24.4B1               | M | 7                                  | 126.1                                                        | 2438.4             | 219                                                | 140                         | 49                           | 18                     | 12                                 | 120.7                                                        | 3008.2             | 450                                                | 293                         | 93                           | 32                     | 32                                 | 122.3                                                        | 2821.7             | 669                                                | 433                         | 142                          | 50                     | 44   |
|         | LepR Iplp         | 25.1B1               | M | 8                                  | 117.7                                                        | 2018.9             | 294                                                | 211                         | 54                           | 16                     | 13                                 | 130.1                                                        | 2533.3             | 713                                                | 505                         | 126                          | 34                     | 48                                 | 123.0                                                        | 2383.1             | 1007                                               | 716                         | 180                          | 50                     | 61   |
|         | Average           |                      |   |                                    | 127.5                                                        | 2057.3             | 354.5                                              | 255.9                       | 65.5                         | 15.3                   | 17.9                               | 142.0                                                        | 2380.6             | 521.8                                              | 366.9                       | 96.3                         | 27.3                   | 31.4                               | 134.8                                                        | 2248.0             | 876.3                                              | 622.8                       | 161.8                        | 42.5                   | 47.6 |
|         | SEM               |                      |   |                                    | 4.9                                                          | 222.3              | 52.3                                               | 44.8                        | 6.1                          | 1.8                    | 3.0                                | 6.5                                                          | 174.2              | 54.4                                               | 44.0                        | 7.6                          | 1.6                    | 4.1                                | 4.7                                                          | 162.8              | 96.9                                               | 81.7                        | 11.5                         | 2.6                    | 5.4  |
| LepR KO | Ubc Cre LepR Iplp | 63.1B1               | F | 1                                  | 177.0                                                        | 2992.3             | 359                                                | 235                         | 72                           | 21                     | 31                                 | 199.9                                                        | 3823.6             | 479                                                | 305                         | 97                           | 27                     | 50                                 | 188.2                                                        | 3467.4             | 838                                                | 540                         | 169                          | 48                     | 81   |
|         | Ubc Cre LepR Iplp | 64.1B1               | F | 2                                  | 123.6                                                        | 2294.9             | 689                                                | 491                         | 128                          | 31                     | 39                                 | 174.7                                                        | 3589.9             | 481                                                | 307                         | 91                           | 32                     | 51                                 | 145.8                                                        | 2826.0             | 1170                                               | 798                         | 219                          | 63                     | 80   |
|         | Ubc Cre LepR Iplp | 64.2B1               | F | 3                                  | 130.7                                                        | 2598.3             | 635                                                | 453                         | 128                          | 16                     | 38                                 | 149.1                                                        | 2933.8             | 534                                                | 370                         | 103                          | 26                     | 35                                 | 139.7                                                        | 2744.9             | 1169                                               | 823                         | 231                          | 42                     | 73   |
|         | Ubc Cre LepR Iplp | 62.1B1               | M | 4                                  | 219.7                                                        | 2824.1             | 528                                                | 320                         | 142                          | 32                     | 34                                 | 171.6                                                        | 3844.2             | 916                                                | 597                         | 189                          | 46                     | 84                                 | 194.6                                                        | 3471.2             | 1444                                               | 917                         | 331                          | 78                     | 118  |
|         | Ubc Cre LepR Iplp | 62.2B1               | M | 5                                  | 205.1                                                        | 3141.7             | 353                                                | 242                         | 70                           | 13                     | 28                                 | 172.8                                                        | 3864.9             | 520                                                | 326                         | 117                          | 19                     | 58                                 | 186.8                                                        | 3572.5             | 873                                                | 568                         | 187                          | 32                     | 86   |
|         | Ubc Cre LepR Iplp | 22.1B1               | M | 6                                  | 157.8                                                        | 4269.5             | 442                                                | 297                         | 76                           | 23                     | 46                                 | 151.0                                                        | 4639.3             | 699                                                | 423                         | 141                          | 42                     | 93                                 | 154.8                                                        | 4496.0             | 1141                                               | 720                         | 217                          | 65                     | 139  |
|         | Ubc Cre LepR Iplp | 22.3B1               | M | 7                                  | 157.0                                                        | 3380.6             | 420                                                | 249                         | 112                          | 22                     | 37                                 | 147.2                                                        | 7087.7             | 605                                                | 346                         | 111                          | 41                     | 107                                | 150.1                                                        | 5588.7             | 1025                                               | 595                         | 223                          | 63                     | 144  |
|         | Ubc Cre LepR Iplp | 22.4B1               | M | 8                                  | 139.5                                                        | 2646.7             | 587                                                | 394                         | 123                          | 32                     | 38                                 | 128.2                                                        | 4382.4             | 744                                                | 472                         | 151                          | 33                     | 88                                 | 131.8                                                        | 3616.9             | 1331                                               | 866                         | 274                          | 65                     | 126  |
|         | Ubc Cre LepR Iplp | 22.5B1               | M | 9                                  | 149.0                                                        | 4110.1             | 711                                                | 441                         | 160                          | 41                     | 69                                 | 156.4                                                        | 5198.8             | 764                                                | 438                         | 188                          | 53                     | 105                                | 151.8                                                        | 4674.0             | 1475                                               | 879                         | 328                          | 94                     | 174  |
|         | Ubc Cre LepR Iplp | 24.1B1               | M | 10                                 | ND                                                           | ND                 | ND                                                 | ND                          | ND                           | ND                     | ND                                 | ND                                                           | ND                 | ND                                                 | ND                          | ND                           | ND                     | ND                                 | ND                                                           | ND                 | ND                                                 | ND                          | ND                           | ND                     | ND   |
| Average |                   |                      |   | 162.2                              | 3139.8                                                       | 524.9              | 346.9                                              | 112.3                       | 25.7                         | 40.0                   | 161.2                              | 4373.5                                                       | 638.0              | 398.2                                              | 129.8                       | 35.4                         | 74.6                   | 160.4                              | 3826.4                                                       | 1162.9             | 745.1                                              | 242.1                       | 61.1                         | 114.6                  |      |
| SEM     |                   |                      |   | 10.9                               | 225.1                                                        | 46.0               | 33.2                                               | 10.9                        | 3.0                          | 4.0                    | 6.9                                | 402.3                                                        | 50.5               | 31.8                                               | 11.4                        | 3.6                          | 8.8                    | 7.7                                | 305.9                                                        | 75.8               | 48.2                                               | 19.1                        | 6.2                          | 11.4                   |      |
| p-value |                   |                      |   | 0.01                               | 0.004                                                        | 0.03               | 0.12                                               | 0.002                       | 0.01                         | 0.0006                 | 0.06                               | 0.0006                                                       | 0.14               | 0.57                                               | 0.03                        | 0.07                         | 0.0007                 | 0.015                              | 0.0005                                                       | 0.03               | 0.20                                               | 0.003                       | 0.02                         | 0.0002                 |      |

  

|                   |           | <b>Week 5</b>        |       |                                    |                                                              |                    |                                                    |                             |                              |                        |                                    |                                                              |                    |                                                    |                             |                              |                        |                                    |                                                              |                    |                                                    |                             |                              |                        |        |     |
|-------------------|-----------|----------------------|-------|------------------------------------|--------------------------------------------------------------|--------------------|----------------------------------------------------|-----------------------------|------------------------------|------------------------|------------------------------------|--------------------------------------------------------------|--------------------|----------------------------------------------------|-----------------------------|------------------------------|------------------------|------------------------------------|--------------------------------------------------------------|--------------------|----------------------------------------------------|-----------------------------|------------------------------|------------------------|--------|-----|
|                   |           | <b>Head Pancreas</b> |       |                                    |                                                              |                    |                                                    |                             |                              | <b>Tail Pancreas</b>   |                                    |                                                              |                    |                                                    |                             |                              |                        | <b>Total Pancreas</b>              |                                                              |                    |                                                    |                             |                              |                        |        |     |
| Group             | ID Number | Sex                  | #     | Beta Cell Size ( $\mu\text{m}^2$ ) | Cross-sectional Beta Cell Area per Islet ( $\mu\text{m}^2$ ) | Total Islet Number | Number of Islet per Islet Size ( $\mu\text{m}^2$ ) |                             |                              |                        | Beta Cell Size ( $\mu\text{m}^2$ ) | Cross-sectional Beta Cell Area per Islet ( $\mu\text{m}^2$ ) | Total Islet Number | Number of Islet per Islet Size ( $\mu\text{m}^2$ ) |                             |                              |                        | Beta Cell Size ( $\mu\text{m}^2$ ) | Cross-sectional Beta Cell Area per Islet ( $\mu\text{m}^2$ ) | Total Islet Number | Number of Islet per Islet Size ( $\mu\text{m}^2$ ) |                             |                              |                        |        |     |
|                   |           |                      |       |                                    |                                                              |                    | <1000 $\mu\text{m}^2$                              | 1001 - 5000 $\mu\text{m}^2$ | 5001 - 10000 $\mu\text{m}^2$ | >10000 $\mu\text{m}^2$ |                                    |                                                              |                    | <1000 $\mu\text{m}^2$                              | 1001 - 5000 $\mu\text{m}^2$ | 5001 - 10000 $\mu\text{m}^2$ | >10000 $\mu\text{m}^2$ |                                    |                                                              |                    | <1000 $\mu\text{m}^2$                              | 1001 - 5000 $\mu\text{m}^2$ | 5001 - 10000 $\mu\text{m}^2$ | >10000 $\mu\text{m}^2$ |        |     |
| Control           | LepR Iplp | 974.2                | F     | 1                                  | 101.8                                                        | 1911.7             | 201.17                                             | 142                         | 48                           | 12                     | 9                                  | 127.2                                                        | 3458.3             | 321                                                | 201                         | 68                           | 23                     | 29                                 | 118.4                                                        | 2844.9             | 532                                                | 343                         | 116                          | 35                     | 38     |     |
|                   | LepR Iplp | 980.1                | F     | 3                                  | 113.1                                                        | 1598.4             | 340                                                | 243                         | 66                           | 20                     | 11                                 | 103.7                                                        | 3061.8             | 267                                                | 167                         | 59                           | 17                     | 24                                 | 107.1                                                        | 2242.1             | 607                                                | 410                         | 125                          | 37                     | 35     |     |
|                   | LepR Iplp | 980.2                | F     | 4                                  | 88.0                                                         | 1581.9             | 264                                                | 185                         | 69                           | 9                      | 11                                 | 111.9                                                        | 2772.9             | 218                                                | 125                         | 47                           | 20                     | 26                                 | 103.3                                                        | 2302.2             | 1012                                               | 504                         | 248                          | 91                     | 169    |     |
|                   | LepR Iplp | 980.3                | F     | 5                                  | 97.8                                                         | 1591.4             | 322                                                | 227                         | 70                           | 14                     | 11                                 | 107.4                                                        | 2511.1             | 371                                                | 223                         | 92                           | 33                     | 23                                 | 102.2                                                        | 2083.8             | 693                                                | 450                         | 162                          | 47                     | 34     |     |
|                   | LepR Iplp | 981.2                | F     | 6                                  | ND                                                           | 1973.9             | 246                                                | 179                         | 39                           | 16                     | 12                                 | ND                                                           | 2853.9             | 397                                                | 246                         | 98                           | 19                     | 34                                 | ND                                                           | 2517.2             | 643                                                | 425                         | 137                          | 35                     | 46     |     |
|                   | LepR Iplp | 981.4                | F     | 7                                  | ND                                                           | 1759.0             | 358                                                | 252                         | 77                           | 12                     | 17                                 | ND                                                           | 3040.8             | 486                                                | 294                         | 114                          | 33                     | 44                                 | ND                                                           | 2496.5             | 843                                                | 548                         | 191                          | 45                     | 61     |     |
|                   | Average   |                      |       |                                    | 100.2                                                        | 1730.0             | 280.5                                              | 204.7                       | 69.8                         | 13.8                   | 11.8                               | 112.5                                                        | 2949.8             | 343.2                                              | 209.3                       | 79.7                         | 24.2                   | 30.0                               | 107.8                                                        | 2414.4             | 721.7                                              | 445.3                       | 163.17                       | 48.33                  | 63.83  |     |
|                   | SEM       |                      |       |                                    | 5.2                                                          | 71.1               | 24.9                                               | 17.5                        | 5.8                          | 1.6                    | 1.1                                | 5.2                                                          | 130.7              | 39.1                                               | 24.3                        | 10.5                         | 2.9                    | 3.2                                | 3.7                                                          | 108.7              | 71.9                                               | 29.3                        | 20.28                        | 8.79                   | 21.43  |     |
|                   | LepR KO   | Ubc Cre LepR Iplp    | 974.1 | F                                  | 1                                                            | 119.9              | 4455.9                                             | 260                         | 138                          | 69                     | 25                                 | 28                                                           | 119.8              | 6888.8                                             | 479                         | 256                          | 116                    | 36                                 | 71                                                           | 119.8              | 6039.3                                             | 739                         | 394                          | 185                    | 61     | 99  |
|                   |           | Ubc Cre LepR Iplp    | 974.4 | F                                  | 2                                                            | 136.6              | 3752.7                                             | 519                         | 288                          | 140                    | 39                                 | 52                                                           | 124.4              | 5910.1                                             | 514                         | 268                          | 126                    | 51                                 | 69                                                           | 130.3              | 4826.2                                             | 1033                        | 556                          | 266                    | 90     | 121 |
| Ubc Cre LepR Iplp |           | 974.5                | F     | 3                                  | 103.0                                                        | 2984.0             | 436                                                | 266                         | 104                          | 35                     | 31                                 | 126.9                                                        | 4155.0             | 272                                                | 170                         | 66                           | 14                     | 22                                 | 116.4                                                        | 3433.9             | 708                                                | 436                         | 170                          | 49                     | 53     |     |
| Ubc Cre LepR Iplp |           | 978.1                | F     | 4                                  | 112.5                                                        | 4197.1             | 322                                                | 192                         | 83                           | 16                     | 31                                 | 109.3                                                        | 7102.4             | 376                                                | 199                         | 89                           | 27                     | 63                                 | 110.1                                                        | 5766.0             | 700                                                | 391                         | 172                          | 43                     | 84     |     |
| Ubc Cre LepR Iplp |           | 978.5                | F     | 5                                  | 98.6                                                         | 3669.2             | 608                                                | 338                         | 164                          | 48                     | 58                                 | 115.7                                                        | 5332.3             | 455                                                | 223                         | 135                          | 28                     | 69                                 | 105.1                                                        | 4381.1             | 1063                                               | 561                         | 299                          | 76                     | 127    |     |
| Ubc Cre LepR Iplp |           | 981.1                | F     | 6                                  | 152.7                                                        | 3490.9             | 570                                                | 327                         | 148                          | 44                     | 51                                 | 145.0                                                        | 5050.8             | 873                                                | 528                         | 194                          | 41                     | 110                                | 147.9                                                        | 4434.6             | 1443                                               | 855                         | 342                          | 85                     | 161    |     |
| Ubc Cre LepR Iplp |           | 981.3                | F     | 7                                  | ND                                                           | 3828.4             | 1115                                               | 247                         | 114                          | 28                     | 41                                 | ND                                                           | 5956.7             | 453                                                | 232                         | 117                          | 35                     | 69                                 | ND                                                           | 4920.2             | 1568                                               | 479                         | 231                          | 63                     | 110    |     |
| Average           |           |                      |       |                                    | 120.5                                                        | 3768.3             | 547.1                                              | 266.6                       | 117.4                        | 33.6                   | 41.7                               | 123.0                                                        | 5772.3             | 489.1                                              | 289.0                       | 120.4                        | 33.1                   | 67.5                               | 121.6                                                        | 4828.7             | 1036.3                                             | 524.6                       | 237.86                       | 66.71                  | 109.29 |     |
| SEM               |           |                      |       |                                    | 8.5                                                          | 180.1              | 106.1                                              | 27.2                        | 13.2                         | 4.3                    | 4.6                                | 5.3                                                          | 391.0              | 70.7                                               | 45.1                        | 15.1                         | 4.4                    | 9.7                                | 6.3                                                          | 332.9              | 134.4                                              | 61.0                        | 25.43                        | 6.70                   | 12.57  |     |
| p-value           |           |                      |       |                                    | 0.11                                                         | 8.6E-07            | 0.05                                               | 0.15                        | 0.003                        | 0.002                  | 0.0001                             | 0.22                                                         | 5.1E-05            | 0.11                                               | 0.30                        | 0.06                         | 0.13                   | 0.005                              | 0.14                                                         | 4.9E-05            | 0.08                                               | 0.30                        | 0.047                        | 0.12                   | 0.08   |     |
