# Supplementary material for: Extreme obesity induces massive beta cell expansion in mice through self-renewal and does not alter the beta cell lineage
Source: PubMed Central journal article supplement (PMC4869735; doi:10.1007/s00125-016-3922-7), 2016-03-22
Supplement: 125_2016_3922_MOESM9_ESM.pdf [file 125_2016_3922_MOESM9_ESM.pdf]

**ESM Table 7. Individual physiologic data from Rosa Confetti LepR Ip/Ip and Ubc Cre Rosa Confetti LepR Ip/Ip mice.** Initial and final body weight (g), gonadal fat weight (g), initial and final blood glucose (mmol/l), glucose tolerance test blood glucose measurements (mmol/l) after overnight fast (mmol/l) and at time 15, 30, 60, and 120 min followed by the area under the curve (AUC; mmol/l x min). Measurements were made in three different cohorts of Rosa Confetti LepR Ip/Ip and Ubc Cre Rosa Confetti LepR Ip/Ip mice at 1, 3, and 5 weeks after tamoxifen initiation.

| 1 month washout |                              |           |     |     |                |              |               |                   |                   |                  |                    |                    |                    |                     |        |
|-----------------|------------------------------|-----------|-----|-----|----------------|--------------|---------------|-------------------|-------------------|------------------|--------------------|--------------------|--------------------|---------------------|--------|
|                 | Group                        | ID Number | Sex | #   | Initial Wt (g) | Final Wt (g) | Gonad Fat (g) | Init. BG (mmol/l) | Final BG (mmol/l) | Fast BG (mmol/l) | 15 min BG (mmol/l) | 30 min BG (mmol/l) | 60 min BG (mmol/l) | 120 min BG (mmol/l) | AUC    |
| Control         | Conf/Conf LepR Ip/Ip         | 130.1BI   | M   | 1   | 21.8           | 25.4         | ND            | 10.6              | 11.0              | 4.7              | 14.4               | 14.3               | 11.3               | 5.9                 | 1258.8 |
|                 | Conf/Conf LepR Ip/Ip         | 130.3BI   | M   | 2   | 19.3           | 24.0         | ND            | 11.9              | 9.6               | 4.7              | 15.9               | 12.6               | 9.1                | 4.9                 | 1110.8 |
|                 | Conf/Conf LepR Ip/Ip         | 131.2BI   | M   | 3   | 19.3           | 22.5         | ND            | 12.6              | 7.9               | 4.2              | 16.8               | 11.3               | 9.2                | 4.1                 | 1074.6 |
|                 | Conf/Conf LepR Ip/Ip         | 143.3BI   | M   | 4   | 19.0           | 25.5         | 201           | 7.6               | 7.3               | 3.8              | 13.9               | 14.3               | 10.9               | 4.9                 | 1196.7 |
|                 | Average                      |           |     |     | 19.9           | 24.4         | 201.0         | 10.7              | 9.0               | 4.3              | 15.3               | 13.1               | 10.1               | 4.9                 | 1160.2 |
|                 | SEM                          |           |     |     | 0.7            | 0.7          | ND            | 1.1               | 0.8               | 0.2              | 0.7                | 0.7                | 0.6                | 0.4                 | 41.6   |
| LepR KO         | Ubc Cre Conf/Conf LepR Ip/Ip | 130.2BI   | M   | 1   | 19.1           | 46.6         | ND            | 10.5              | 17.5              | 8.3              | 22.0               | HI                 | 24.0               | 17.4                | 2622.1 |
|                 | Ubc Cre Conf/Conf LepR Ip/Ip | 130.4BI   | M   | 2   | 21.0           | 48.5         | ND            | 10.4              | 15.8              | 7.8              | 22.7               | 26.4               | 23.7               | 11.6                | 2407.9 |
|                 | Ubc Cre Conf/Conf LepR Ip/Ip | 131.1BI   | M   | 3   | 20.0           | 48.9         | ND            | 12.3              | 20.1              | 6.9              | 20.1               | 14.8               | 11.8               | 6.3                 | 1408.3 |
|                 | Ubc Cre Conf/Conf LepR Ip/Ip | 131.3BI   | M   | 4   | 19.9           | 37.7         | ND            | 9.2               | 12.3              | 6.4              | 16.4               | 14.2               | 10.1               | 7.5                 | 1292.1 |
|                 | Ubc Cre Conf/Conf LepR Ip/Ip | 131.4BI   | M   | 5   | 20.4           | 51.8         | ND            | 14.1              | 11.8              | 7.3              | 20.9               | 24.4               | 26.1               | 15.5                | 2558.8 |
|                 | Ubc Cre Conf/Conf LepR Ip/Ip | 141.1BI   | M   | 6   | 22.2           | 53.6         | 2936          | 7.4               | 8.1               | 8.2              | 24.1               | 24.6               | 23.9               | 20.9                | 2682.9 |
|                 | Ubc Cre Conf/Conf LepR Ip/Ip | 141.2BI   | M   | 7   | 22.8           | 54.8         | 3406          | 7.0               | 8.5               | 6.2              | 19.2               | 24.2               | 24.6               | 12.9                | 2374.6 |
|                 | Ubc Cre Conf/Conf LepR Ip/Ip | 143.1BI   | M   | 8   | 20.8           | 51.0         | 2442          | 8.9               | 10.3              | 5.7              | 15.6               | 18.4               | 17.4               | 9.6                 | 1760.8 |
|                 | Ubc Cre Conf/Conf LepR Ip/Ip | 143.2BI   | M   | 9   | 20.0           | 52.0         | 3133          | 10.2              | 12.7              | 5.4              | 20.1               | 22.3               | 17.5               | 9.4                 | 1912.9 |
|                 | Average                      |           |     |     | 20.7           | 49.4         | 2979.3        | 10.0              | 13.0              | 6.9              | 20.1               | 21.2               | 19.9               | 12.3                | 2113.4 |
| SEM             |                              |           |     | 0.4 | 1.7            | 203.4        | 0.7           | 1.4               | 0.4               | 0.9              | 1.7                | 2.0                | 1.6                | 177.7               |        |
|                 | p-value                      |           |     |     | 0.27           | 1.27E-06     | ND            | 0.63              | 0.09              | 0.0009           | 0.007              | 0.009              | 0.009              | 0.01                | 0.005  |

| 6 month washout |                              |           |     |     |                |              |               |                   |                   |                  |                    |                    |                    |                     |        |
|-----------------|------------------------------|-----------|-----|-----|----------------|--------------|---------------|-------------------|-------------------|------------------|--------------------|--------------------|--------------------|---------------------|--------|
|                 | Group                        | ID Number | Sex | #   | Initial Wt (g) | Final Wt (g) | Gonad Fat (g) | Init. BG (mmol/l) | Final BG (mmol/l) | Fast BG (mmol/l) | 15 min BG (mmol/l) | 30 min BG (mmol/l) | 60 min BG (mmol/l) | 120 min BG (mmol/l) | AUC    |
| Control         | Conf/Conf LepR Ip/Ip         | 165.1BI   | M   | 1   | 21.4           | 40.7         | 1982          | 10.3              | 10.3              | 3.8              | 13.7               | 11.1               | 9.3                | 6.9                 | 1110.0 |
|                 | Conf/Conf LepR Ip/Ip         | 168.2BI   | M   | 2   | 20.6           | 32.2         | 739           | 9.2               | 8.1               | 4.3              | 14.4               | 14.1               | 11.9               | 6.1                 | 1286.7 |
|                 | Conf/Conf LepR Ip/Ip         | 265.3BI   | M   | 3   | 21.2           | 32.9         | 823           | 7.8               | 7.9               | 3.6              | 18.0               | 14.1               | 8.0                | 7.0                 | 1184.2 |
|                 | Average                      |           |     |     | 21.1           | 35.3         | 1181.3        | 9.1               | 8.8               | 3.9              | 15.4               | 13.1               | 9.7                | 6.7                 | 1193.6 |
|                 | SEM                          |           |     |     | 0.2            | 2.7          | 401.1         | 0.7               | 0.8               | 0.2              | 1.3                | 1.0                | 1.2                | 0.3                 | 51.2   |
| LepR KO         | Ubc Cre Conf/Conf LepR Ip/Ip | 168.1BI   | M   | 1   | 22.1           | 56.2         | 1747          | 6.4               | 9.3               | 4.0              | 15.0               | 17.7               | 13.6               | 6.9                 | 1471.7 |
|                 | Ubc Cre Conf/Conf LepR Ip/Ip | 168.4BI   | M   | 2   | 20.5           | 56.9         | 1681          | 8.1               | 9.6               | 5.0              | 13.4               | 15.6               | 17.1               | 9.4                 | 1641.3 |
|                 | Ubc Cre Conf/Conf LepR Ip/Ip | 168.5BI   | M   | 3   | 23.7           | 63.9         | 1691          | 9.4               | 10.4              | 4.9              | 11.1               | 12.7               | 11.9               | 9.8                 | 1320.0 |
|                 | Ubc Cre Conf/Conf LepR Ip/Ip | 265.1BI   | M   | 4   | 21.2           | 55.1         | 1307          | 9.4               | 7.3               | 4.4              | 14.7               | 15.2               | 14.8               | 9.1                 | 1532.1 |
|                 | Ubc Cre Conf/Conf LepR Ip/Ip | 265.2BI   | M   | 5   | 21.4           | 53.2         | 1789          | 9.5               | 6.7               | 5.2              | 10.7               | 14.9               | 15.4               | 12.7                | 1606.7 |
|                 | Ubc Cre Conf/Conf LepR Ip/Ip | 265.4BI   | M   | 6   | 20.9           | 53.0         | 1167          | 7.2               | 8.1               | 5.8              | 15.8               | 18.4               | 15.6               | 8.1                 | 1638.3 |
|                 | Ubc Cre Conf/Conf LepR Ip/Ip | 265.5BI   | M   | 7   | 21.0           | 58.6         | 1500          | 7.5               | 7.8               | 5.2              | 13.6               | 17.1               | 16.1               | 18.1                | 1894.2 |
|                 | Average                      |           |     |     | 21.5           | 56.7         | 1554.6        | 8.2               | 8.4               | 4.9              | 13.5               | 15.9               | 14.9               | 10.6                | 1586.3 |
| SEM             |                              |           |     | 0.4 | 1.4            | 90.1         | 0.5           | 0.5               | 0.2               | 0.7              | 0.7                | 0.6                | 1.4                | 66.9                |        |
|                 | p-value                      |           |     |     | 0.49           | 5.53E-05     | 0.22          | 0.33              | 0.72              | 0.02             | 0.21               | 0.06               | 0.003              | 0.12                | 0.007  |

| 6 month washout on a High Fat Diet |                              |           |     |     |                |              |               |                   |                   |                  |                    |                    |                    |                     |        |
|------------------------------------|------------------------------|-----------|-----|-----|----------------|--------------|---------------|-------------------|-------------------|------------------|--------------------|--------------------|--------------------|---------------------|--------|
|                                    | Group                        | ID Number | Sex | #   | Initial Wt (g) | Final Wt (g) | Gonad Fat (g) | Init. BG (mmol/l) | Final BG (mmol/l) | Fast BG (mmol/l) | 15 min BG (mmol/l) | 30 min BG (mmol/l) | 60 min BG (mmol/l) | 120 min BG (mmol/l) | AUC    |
| Control                            | Conf/Conf LepR Ip/Ip         | 272.1BI   | M   | 1   | 23.2           | 56.7         | 2042          | 9.4               | 9.6               | 3.3              | 9.9                | 13.1               | 12.6               | 8.2                 | 1279.2 |
|                                    | Conf/Conf LepR Ip/Ip         | 272.5BI   | M   | 2   | 23.0           | 44.9         | 2800          | 7.9               | 8.3               | 4.9              | 16.0               | 20.3               | 15.0               | 9.1                 | 1681.3 |
|                                    | Average                      |           |     |     | 23.1           | 50.8         | 2421.0        | 8.7               | 8.9               | 4.1              | 13.0               | 16.7               | 13.8               | 8.6                 | 8.6    |
|                                    | SEM                          |           |     |     | 0.1            | 5.9          | 379.0         | 0.8               | 0.7               | 0.8              | 3.0                | 3.6                | 1.2                | 0.5                 | 0.5    |
| LepR KO                            | Ubc Cre Conf/Conf LepR Ip/Ip | 272.2BI   | M   | 1   | 22.1           | 64.6         | 2261          | 8.8               | 7.6               | 4.9              | 17.5               | 21.4               | 20.8               | 13.3                | 2117   |
|                                    | Ubc Cre Conf/Conf LepR Ip/Ip | 272.3BI   | M   | 2   | 19.1           | 52.0         | 2262          | 6.2               | 7.0               | 4.7              | 13.6               | 17.4               | 16.8               | 15.1                | 1838   |
|                                    | Ubc Cre Conf/Conf LepR Ip/Ip | 351.1BI   | M   | 4   | 21.2           | 72.2         | 1331          | 5.7               | 8.6               | 4.0              | 15.1               | 17.4               | 17.7               | 13.8                | 1859   |
|                                    | Ubc Cre Conf/Conf LepR Ip/Ip | 351.2BI   | M   | 5   | 17.7           | 60.9         | 1677          | 6.1               | 6.3               | 4.3              | 9.8                | 17.7               | 17.7               | 8.7                 | 1637   |
|                                    | Ubc Cre Conf/Conf LepR Ip/Ip | 351.3BI   | M   | 6   | 21.1           | 57.7         | 1383          | 9.2               | 8.1               | 4.9              | 9.6                | 17.0               | 14.1               | 10.2                | 1503   |
|                                    | Average                      |           |     |     | 20.2           | 61.5         | 1782.8        | 7.2               | 7.5               | 4.6              | 13.1               | 18.2               | 17.4               | 12.2                | 1790.9 |
| SEM                                |                              |           |     | 0.8 | 3.4            | 204.1        | 0.7           | 0.4               | 0.2               | 1.5              | 0.8                | 1.1                | 1.2                | 104.8               |        |
|                                    | p-value                      |           |     |     | 0.09           | 0.16         | 0.17          | 0.30              | 0.12              | 0.40             | 0.97               | 0.55               | 0.11               | 0.14                | 0.19   |
