# Supplementary material for: Extreme obesity induces massive beta cell expansion in mice through self-renewal and does not alter the beta cell lineage
Source: PubMed Central journal article supplement (PMC4869735; doi:10.1007/s00125-016-3922-7), 2016-03-22
Supplement: 125_2016_3922_MOESM10_ESM.pdf [file 125_2016_3922_MOESM10_ESM.pdf]

**ESM Table 8. Clonal analysis from Ubc Cre Rosa Confetti LepR Ip/Ip mice.** Total number of islets imaged, total number of contiguous clones counted, total number of labelled cells counted, and the average clone size for pancreatic islets in Ubc Cre Rosa Confetti LepR Ip/Ip mice following a 1- or 6-month washout on a regular chow, or a 6-month washout on a high fat diet (HFD). Contiguous clones analyzed contained 1 to 7 cells. The number of clones containing a given number of cells as percentage of the total number of clones counted. For all islets imaged across three cohorts, no islets were monoclonal (single color islets) in which all cells would be labelled with the same color.

| 1 month washout |                              |           |     |   |                     |                                 |                              |                    |                                                     |       |      |      |      |      |      |                     |
|-----------------|------------------------------|-----------|-----|---|---------------------|---------------------------------|------------------------------|--------------------|-----------------------------------------------------|-------|------|------|------|------|------|---------------------|
|                 | Group                        | ID Number | Sex | # | Total Islets Imaged | Total Contiguous Clones Counted | Total Labelled Cells Counted | Average Clone Size | Number of Clones for Given Size (% of total clones) |       |      |      |      |      |      | Single Color Islets |
|                 |                              |           |     |   |                     |                                 |                              |                    | 1                                                   | 2     | 3    | 4    | 5    | 6    | 7    |                     |
| LepR KO         | Ubc Cre Conf/Conf LepR Ip/Ip | 130.4Bl   | M   | 1 | 34                  | 917                             | 1126                         | 1.23               | 81.13                                               | 15.59 | 2.62 | 0.65 | 0.00 | 0.00 | 0.00 | 0                   |
|                 | Ubc Cre Conf/Conf LepR Ip/Ip | 131.1Bl   | M   | 2 | 16                  | 399                             | 461                          | 1.16               | 87.97                                               | 9.27  | 2.01 | 0.75 | 0.00 | 0.00 | 0.00 | 0                   |
|                 | Ubc Cre Conf/Conf LepR Ip/Ip | 141.1Bl   | M   | 3 | 16                  | 295                             | 328                          | 1.11               | 89.83                                               | 9.15  | 1.02 | 0.00 | 0.00 | 0.00 | 0.00 | 0                   |
|                 | Ubc Cre Conf/Conf LepR Ip/Ip | 143.1Bl   | M   | 4 | 10                  | 237                             | 266                          | 1.12               | 89.87                                               | 8.02  | 2.11 | 0.00 | 0.00 | 0.00 | 0.00 | 0                   |
|                 | Average                      |           |     |   | 19.0                | 462.0                           | 545.3                        | 1.16               | 87.20                                               | 10.51 | 1.94 | 0.35 | 0.00 | 0.00 | 0.00 | 0.00                |
|                 | SEM                          |           |     |   | 5.2                 | 155.3                           | 197.8                        | 0.03               | 2.07                                                | 1.72  | 0.33 | 0.20 | 0.00 | 0.00 | 0.00 | 0.00                |

| 6 month washout |                              |           |     |   |                     |                                 |                              |                    |                                                     |       |      |      |      |      |      |                     |
|-----------------|------------------------------|-----------|-----|---|---------------------|---------------------------------|------------------------------|--------------------|-----------------------------------------------------|-------|------|------|------|------|------|---------------------|
|                 | Group                        | ID Number | Sex | # | Total Islets Imaged | Total Contiguous Clones Counted | Total Labelled Cells Counted | Average Clone Size | Number of Clones for Given Size (% of total clones) |       |      |      |      |      |      | Single Color Islets |
|                 |                              |           |     |   |                     |                                 |                              |                    | 1                                                   | 2     | 3    | 4    | 5    | 6    | 7    |                     |
| LepR KO         | Ubc Cre Conf/Conf LepR Ip/Ip | 168.5Bl   | M   | 1 | 93                  | 821                             | 1161                         | 1.41               | 72.35                                               | 18.64 | 5.60 | 2.44 | 0.61 | 0.37 | 0.00 | 0                   |
|                 | Ubc Cre Conf/Conf LepR Ip/Ip | 265.1Bl   | M   | 2 | 18                  | 708                             | 960                          | 1.36               | 75.71                                               | 16.38 | 5.51 | 1.69 | 0.42 | 0.28 | 0.00 | 0                   |
|                 | Ubc Cre Conf/Conf LepR Ip/Ip | 265.2Bl   | M   | 3 | 58                  | 420                             | 477                          | 1.14               | 79.52                                               | 11.67 | 2.38 | 0.24 | 0.24 | 0.00 | 0    |                     |
|                 | Ubc Cre Conf/Conf LepR Ip/Ip | 265.4Bl   | M   | 4 | 18                  | 757                             | 978                          | 1.29               | 78.07                                               | 15.98 | 4.89 | 0.79 | 0.26 | 0.00 | 0.00 | 0                   |
|                 | Ubc Cre Conf/Conf LepR Ip/Ip | 265.5Bl   | M   | 5 | 25                  | 449                             | 537                          | 1.20               | 84.63                                               | 12.03 | 2.67 | 0.45 | 0.22 | 0.00 | 0.00 | 0                   |
|                 | Average                      |           |     |   | 42.4                | 631.0                           | 822.6                        | 1.28               | 78.06                                               | 14.94 | 4.21 | 1.12 | 0.35 | 0.18 | 0.00 | 0.00                |
|                 | SEM                          |           |     |   | 14.7                | 82.3                            | 133.9                        | 0.05               | 2.04                                                | 1.34  | 0.70 | 0.41 | 0.07 | 0.08 | 0.00 | 0.00                |

| 6 month washout on a HFD |                              |           |     |   |                     |                                 |                              |                    |                                                     |       |      |      |      |      |      |                     |
|--------------------------|------------------------------|-----------|-----|---|---------------------|---------------------------------|------------------------------|--------------------|-----------------------------------------------------|-------|------|------|------|------|------|---------------------|
|                          | Group                        | ID Number | Sex | # | Total Islets Imaged | Total Contiguous Clones Counted | Total Labelled Cells Counted | Average Clone Size | Number of Clones for Given Size (% of total clones) |       |      |      |      |      |      | Single Color Islets |
|                          |                              |           |     |   |                     |                                 |                              |                    | 1                                                   | 2     | 3    | 4    | 5    | 6    | 7    |                     |
| LepR KO                  | Ubc Cre Conf/Conf LepR Ip/Ip | 351.1Bl   | M   | 1 | 22                  | 827                             | 999                          | 1.21               | 85.13                                               | 10.52 | 3.14 | 0.85 | 0.36 | 0.00 | 0.00 | 0                   |
|                          | Ubc Cre Conf/Conf LepR Ip/Ip | 351.2Bl   | M   | 2 | 17                  | 611                             | 724                          | 1.18               | 85.76                                               | 10.97 | 2.29 | 0.98 | 0.00 | 0.00 | 0.00 | 0                   |
|                          | Ubc Cre Conf/Conf LepR Ip/Ip | 351.3Bl   | M   | 3 | 22                  | 831                             | 1012                         | 1.22               | 84.60                                               | 11.07 | 3.25 | 0.48 | 0.36 | 0.12 | 0.12 | 0                   |
|                          | Average                      |           |     |   | 20.3                | 756.3                           | 911.7                        | 1.20               | 85.16                                               | 10.85 | 2.89 | 0.77 | 0.24 | 0.04 | 0.04 | 0.00                |
|                          | SEM                          |           |     |   | 1.7                 | 72.7                            | 93.9                         | 0.01               | 0.34                                                | 0.17  | 0.30 | 0.15 | 0.12 | 0.04 | 0.04 | 0.00                |
