# Supplementary material for: Extreme obesity induces massive beta cell expansion in mice through self-renewal and does not alter the beta cell lineage
Source: Diabetologia. 2016 Mar 22;59:1231–41. doi: 10.1007/s00125-016-3922-7 (PMC4869735; doi:10.1007/s00125-016-3922-7)
Supplement: Supplementary file 8 — (PDF 81 kb) [file 125_2016_3922_MOESM8_ESM.pdf]

ESM Table 6. Individual  $\beta$ -cell proliferation data from LepR<sup>tg</sup> and Ubc Cre LepR<sup>tg</sup> mice. Total  $\beta$ -cells counted, BrdU+  $\beta$ -cells counted (number) and the percentage of total  $\beta$ -cells, Edu+  $\beta$ -cells counted (number) and the percentage of total  $\beta$ -cells, actual BrdU+ Edu+  $\beta$ -cells counted (number) and the percentage of total  $\beta$ -cells, the predicted number of BrdU+ Edu+  $\beta$ -cells (percent of total  $\beta$ -cells), and the actual BrdU+ Edu+  $\beta$ -cells as a percentage of the predicted BrdU+ Edu+  $\beta$ -cells for the head, tail, and total pancreas. Measurements were made in three different cohorts of LepR<sup>tg</sup> and Ubc Cre LepR<sup>tg</sup> mice at 3 and 5 weeks after tamoxifen initiation.

|         |  | Week 3                           |           |     |      |                |                      |                          |                     |                         |                                  |                                      |                                         |                                      |                |                      |                          |                     |                         |                                  |                                      | Week 5                                  |                                      |                |                      |                          |                     |                         |                                  |                                      |                                         |                                      |                |                      |                          |                     |                         |                                  |                                      |                                         |                                      |        |        |        |        |
|---------|--|----------------------------------|-----------|-----|------|----------------|----------------------|--------------------------|---------------------|-------------------------|----------------------------------|--------------------------------------|-----------------------------------------|--------------------------------------|----------------|----------------------|--------------------------|---------------------|-------------------------|----------------------------------|--------------------------------------|-----------------------------------------|--------------------------------------|----------------|----------------------|--------------------------|---------------------|-------------------------|----------------------------------|--------------------------------------|-----------------------------------------|--------------------------------------|----------------|----------------------|--------------------------|---------------------|-------------------------|----------------------------------|--------------------------------------|-----------------------------------------|--------------------------------------|--------|--------|--------|--------|
|         |  | Group                            | ID Number | Sex | #    | Head Pancreas  |                      |                          |                     |                         |                                  |                                      |                                         |                                      |                | Tail Pancreas        |                          |                     |                         |                                  |                                      |                                         |                                      |                |                      | Total Pancreas           |                     |                         |                                  |                                      |                                         |                                      |                |                      |                          |                     |                         |                                  |                                      |                                         |                                      |        |        |        |        |
|         |  |                                  |           |     |      | $\beta$ -Cells | BrdU+ $\beta$ -Cells | BrdU+ $\beta$ -Cells (%) | Edu+ $\beta$ -Cells | Edu+ $\beta$ -Cells (%) | Actual BrdU+ Edu+ $\beta$ -Cells | Actual BrdU+ Edu+ $\beta$ -Cells (%) | Predicted BrdU+ Edu+ $\beta$ -Cells (%) | Actual BrdU+ Edu+ $\beta$ -Cells (%) | $\beta$ -Cells | BrdU+ $\beta$ -Cells | BrdU+ $\beta$ -Cells (%) | Edu+ $\beta$ -Cells | Edu+ $\beta$ -Cells (%) | Actual BrdU+ Edu+ $\beta$ -Cells | Actual BrdU+ Edu+ $\beta$ -Cells (%) | Predicted BrdU+ Edu+ $\beta$ -Cells (%) | Actual BrdU+ Edu+ $\beta$ -Cells (%) | $\beta$ -Cells | BrdU+ $\beta$ -Cells | BrdU+ $\beta$ -Cells (%) | Edu+ $\beta$ -Cells | Edu+ $\beta$ -Cells (%) | Actual BrdU+ Edu+ $\beta$ -Cells | Actual BrdU+ Edu+ $\beta$ -Cells (%) | Predicted BrdU+ Edu+ $\beta$ -Cells (%) | Actual BrdU+ Edu+ $\beta$ -Cells (%) | $\beta$ -Cells | BrdU+ $\beta$ -Cells | BrdU+ $\beta$ -Cells (%) | Edu+ $\beta$ -Cells | Edu+ $\beta$ -Cells (%) | Actual BrdU+ Edu+ $\beta$ -Cells | Actual BrdU+ Edu+ $\beta$ -Cells (%) | Predicted BrdU+ Edu+ $\beta$ -Cells (%) | Actual BrdU+ Edu+ $\beta$ -Cells (%) |        |        |        |        |
| Control |  | LepR <sup>tg</sup> (p/p)         | 83.2B1    | F   | 1    | 2178           | 306                  | 14.05                    | 109                 | 5.00                    | 1                                | 0.05                                 | 0.70                                    | 6.53                                 | 2353           | 276                  | 11.73                    | 136                 | 5.76                    | 1                                | 0.04                                 | 0.68                                    | 6.27                                 | 4531           | 582                  | 12.84                    | 245                 | 5.41                    | 2                                | 0.04                                 | 0.69                                    | 6.36                                 | 4531           | 582                  | 12.84                    | 245                 | 5.41                    | 2                                | 0.04                                 | 0.69                                    | 6.36                                 |        |        |        |        |
|         |  | LepR <sup>tg</sup> (p/p)         | 83.3B1    | F   | 2    | 3825           | 226                  | 5.91                     | 44                  | 1.15                    | 2                                | 0.05                                 | 0.07                                    | 76.93                                | 6221           | 408                  | 6.56                     | 134                 | 2.15                    | 2                                | 0.03                                 | 0.14                                    | 22.76                                | 10046          | 634                  | 6.31                     | 178                 | 1.77                    | 4                                | 0.04                                 | 0.11                                    | 35.61                                | 10046          | 634                  | 6.31                     | 178                 | 1.77                    | 4                                | 0.04                                 | 0.11                                    | 35.61                                |        |        |        |        |
|         |  | LepR <sup>tg</sup> (p/p)         | 83.4B1    | F   | 3    | 3555           | 304                  | 8.57                     | 116                 | 3.31                    | 2                                | 0.06                                 | 0.25                                    | 19.68                                | 4275           | 466                  | 10.90                    | 163                 | 3.81                    | 3                                | 0.07                                 | 0.42                                    | 16.68                                | 7765           | 770                  | 9.90                     | 279                 | 3.59                    | 5                                | 0.06                                 | 0.35                                    | 16.11                                | 7765           | 770                  | 9.90                     | 279                 | 3.59                    | 5                                | 0.06                                 | 0.35                                    | 16.11                                |        |        |        |        |
|         |  | LepR <sup>tg</sup> (p/p)         | 84.3B1    | F   | 4    | 2360           | 110                  | 4.66                     | 112                 | 4.77                    | 1                                | 0.04                                 | 0.22                                    | 19.07                                | 2475           | 142                  | 5.74                     | 111                 | 4.48                    | 3                                | 0.12                                 | 0.26                                    | 47.11                                | 4825           | 282                  | 5.82                     | 223                 | 4.62                    | 4                                | 0.08                                 | 0.24                                    | 36.34                                | 4825           | 282                  | 5.82                     | 223                 | 4.62                    | 4                                | 0.08                                 | 0.24                                    | 36.34                                |        |        |        |        |
|         |  | LepR <sup>tg</sup> (p/p)         | 82.3B1    | M   | 5    | 2845           | 121                  | 4.25                     | 9                   | 0.32                    | 0                                | 0.00                                 | 0.01                                    | 0.00                                 | 3327           | 206                  | 6.19                     | 42                  | 1.26                    | 2                                | 0.06                                 | 0.08                                    | 76.91                                | 6172           | 327                  | 5.30                     | 51                  | 0.83                    | 2                                | 0.03                                 | 0.04                                    | 74.02                                | 6172           | 327                  | 5.30                     | 51                  | 0.83                    | 2                                | 0.03                                 | 0.04                                    | 74.02                                |        |        |        |        |
|         |  | LepR <sup>tg</sup> (p/p)         | 22.2B1    | M   | 6    | 3287           | 273                  | 8.31                     | 103                 | 3.13                    | 0                                | 0.00                                 | 0.26                                    | 0.00                                 | 5743           | 333                  | 5.60                     | 148                 | 2.58                    | 1                                | 0.02                                 | 0.15                                    | 11.65                                | 9530           | 606                  | 6.37                     | 251                 | 2.78                    | 1                                | 0.01                                 | 0.19                                    | 5.94                                 | 9530           | 606                  | 6.37                     | 251                 | 2.78                    | 1                                | 0.01                                 | 0.19                                    | 5.94                                 |        |        |        |        |
|         |  | LepR <sup>tg</sup> (p/p)         | 24.4B1    | M   | 7    | 1527           | 151                  | 9.86                     | 48                  | 3.14                    | 0                                | 0.00                                 | 0.31                                    | 0.00                                 | 3427           | 259                  | 7.56                     | 116                 | 3.38                    | 1                                | 0.03                                 | 0.26                                    | 11.41                                | 4654           | 410                  | 8.28                     | 184                 | 3.31                    | 1                                | 0.02                                 | 0.27                                    | 7.37                                 | 4654           | 410                  | 8.28                     | 184                 | 3.31                    | 1                                | 0.02                                 | 0.27                                    | 7.37                                 |        |        |        |        |
|         |  | LepR <sup>tg</sup> (p/p)         | 25.1B1    | M   | 8    | 2463           | 187                  | 7.59                     | 164                 | 6.66                    | 0                                | 0.00                                 | 0.51                                    | 0.00                                 | 1797           | 154                  | 8.57                     | 126                 | 7.01                    | 0                                | 0.00                                 | 0.60                                    | 0.00                                 | 4260           | 341                  | 8.00                     | 290                 | 6.81                    | 0                                | 0.00                                 | 0.54                                    | 0.00                                 | 4260           | 341                  | 8.00                     | 290                 | 6.81                    | 0                                | 0.00                                 | 0.54                                    | 0.00                                 |        |        |        |        |
|         |  | SEM                              |           |     |      | 2747.5         | 209.8                | 7.92                     | 86.1                | 3.44                    | 0.8                              | 0.02                                 | 0.30                                    | 15.30                                | 3702.3         | 280.5                | 7.88                     | 122.0               | 3.81                    | 1.6                              | 0.05                                 | 0.32                                    | 24.12                                | 8449.8         | 480.3                | 7.82                     | 210.1               | 3.64                    | 2.4                              | 0.04                                 | 0.31                                    | 22.72                                | 8449.8         | 480.3                | 7.82                     | 210.1               | 3.64                    | 2.4                              | 0.04                                 | 0.31                                    | 22.72                                |        |        |        |        |
|         |  | p-value                          |           |     |      | 270.2          | 28.1                 | 1.12                     | 17.7                | 0.73                    | 0.3                              | 0.01                                 | 0.08                                    | 9.30                                 | 567.1          | 41.1                 | 0.82                     | 12.9                | 0.68                    | 0.4                              | 0.01                                 | 0.08                                    | 9.05                                 | 718.2          | 64.5                 | 0.81                     | 27.4                | 0.99                    | 0.6                              | 0.01                                 | 0.08                                    | 8.72                                 | 718.2          | 64.5                 | 0.81                     | 27.4                | 0.99                    | 0.6                              | 0.01                                 | 0.08                                    | 8.72                                 |        |        |        |        |
| LepR KO |  | Ubc Cre LepR <sup>tg</sup> (p/p) | 83.1B1    | F   | 1    | 2057           | 1039                 | 50.51                    | 904                 | 43.95                   | 100                              | 4.86                                 | 22.20                                   | 21.90                                | 2231           | 957                  | 42.90                    | 378                 | 16.94                   | 71                               | 3.18                                 | 7.27                                    | 43.79                                | 4268           | 1996                 | 46.65                    | 1262                | 29.90                   | 171                              | 3.99                                 | 13.92                                   | 26.66                                | 4268           | 1996                 | 46.65                    | 1262                | 29.90                   | 171                              | 3.99                                 | 13.92                                   | 26.66                                |        |        |        |        |
|         |  | Ubc Cre LepR <sup>tg</sup> (p/p) | 84.1B1    | F   | 2    | 2130           | 896                  | 42.07                    | 281                 | 13.19                   | 26                               | 1.22                                 | 5.55                                    | 22.00                                | 2777           | 1027                 | 36.98                    | 379                 | 13.65                   | 31                               | 1.12                                 | 5.05                                    | 22.12                                | 4907           | 1923                 | 39.19                    | 660                 | 13.45                   | 57                               | 1.16                                 | 5.27                                    | 22.04                                | 4907           | 1923                 | 39.19                    | 660                 | 13.45                   | 57                               | 1.16                                 | 5.27                                    | 22.04                                |        |        |        |        |
|         |  | Ubc Cre LepR <sup>tg</sup> (p/p) | 84.2B1    | F   | 3    | 2058           | 1172                 | 56.95                    | 489                 | 23.76                   | 59                               | 2.87                                 | 13.53                                   | 21.19                                | 1974           | 908                  | 46.00                    | 499                 | 25.28                   | 67                               | 3.39                                 | 11.63                                   | 29.19                                | 4032           | 2080                 | 51.59                    | 988                 | 24.50                   | 126                              | 3.13                                 | 12.64                                   | 24.12                                | 4032           | 2080                 | 51.59                    | 988                 | 24.50                   | 126                              | 3.13                                 | 12.64                                   | 24.12                                |        |        |        |        |
|         |  | Ubc Cre LepR <sup>tg</sup> (p/p) | 82.1B1    | M   | 4    | 2414           | 1222                 | 50.62                    | 815                 | 33.76                   | 85                               | 3.52                                 | 17.09                                   | 20.60                                | 1912           | 838                  | 43.83                    | 650                 | 34.00                   | 91                               | 4.76                                 | 14.90                                   | 31.94                                | 4326           | 2060                 | 47.62                    | 1465                | 33.87                   | 176                              | 4.07                                 | 16.13                                   | 25.23                                | 4326           | 2060                 | 47.62                    | 1465                | 33.87                   | 176                              | 4.07                                 | 16.13                                   | 25.23                                |        |        |        |        |
|         |  | Ubc Cre LepR <sup>tg</sup> (p/p) | 82.2B1    | M   | 5    | 2165           | 1482                 | 68.45                    | 543                 | 25.08                   | 44                               | 2.03                                 | 17.17                                   | 11.84                                | 2093           | 1056                 | 50.45                    | 540                 | 25.52                   | 51                               | 2.44                                 | 14.39                                   | 16.93                                | 4258           | 2038                 | 59.81                    | 1140                | 26.77                   | 95                               | 2.23                                 | 15.98                                   | 13.98                                | 4258           | 2038                 | 59.81                    | 1140                | 26.77                   | 95                               | 2.23                                 | 15.98                                   | 13.98                                |        |        |        |        |
|         |  | Ubc Cre LepR <sup>tg</sup> (p/p) | 22.1B1    | M   | 6    | 3945           | 2023                 | 51.28                    | 662                 | 16.78                   | 73                               | 1.85                                 | 8.61                                    | 21.50                                | 3154           | 1907                 | 50.95                    | 540                 | 17.12                   | 54                               | 1.71                                 | 8.72                                    | 19.63                                | 7059           | 3630                 | 51.13                    | 1202                | 16.93                   | 127                              | 1.79                                 | 8.66                                    | 20.68                                | 7059           | 3630                 | 51.13                    | 1202                | 16.93                   | 127                              | 1.79                                 | 8.66                                    | 20.68                                |        |        |        |        |
|         |  | Ubc Cre LepR <sup>tg</sup> (p/p) | 22.3B1    | M   | 7    | 2995           | 1277                 | 42.64                    | 683                 | 29.48                   | 71                               | 2.37                                 | 12.57                                   | 18.86                                | 7139           | 3210                 | 44.96                    | 1697                | 23.77                   | 189                              | 2.37                                 | 10.69                                   | 22.15                                | 10134          | 4487                 | 44.28                    | 2580                | 25.46                   | 240                              | 2.37                                 | 11.27                                   | 21.01                                | 10134          | 4487                 | 44.28                    | 2580                | 25.46                   | 240                              | 2.37                                 | 11.27                                   | 21.01                                |        |        |        |        |
|         |  | Ubc Cre LepR <sup>tg</sup> (p/p) | 22.4B1    | M   | 8    | 2326           | 1260                 | 54.17                    | 381                 | 16.38                   | 35                               | 1.50                                 | 8.87                                    | 16.96                                | 4928           | 2059                 | 41.78                    | 710                 | 14.41                   | 39                               | 0.79                                 | 6.02                                    | 13.15                                | 7254           | 3319                 | 45.75                    | 1091                | 15.04                   | 74                               | 1.02                                 | 6.88                                    | 14.82                                | 7254           | 3319                 | 45.75                    | 1091                | 15.04                   | 74                               | 1.02                                 | 6.88                                    | 14.82                                |        |        |        |        |
|         |  | Ubc Cre LepR <sup>tg</sup> (p/p) | 22.5B1    | M   | 9    | 4014           | 2167                 | 54.73                    | 720                 | 17.94                   | 70                               | 1.74                                 | 8.82                                    | 17.76                                | 3488           | 1347                 | 54.14                    | 465                 | 19.69                   | 70                               | 2.81                                 | 10.12                                   | 27.61                                | 6502           | 3544                 | 54.51                    | 1185                | 19.23                   | 140                              | 2.15                                 | 9.93                                    | 21.68                                | 6502           | 3544                 | 54.51                    | 1185                | 19.23                   | 140                              | 2.15                                 | 9.93                                    | 21.68                                |        |        |        |        |
|         |  | Ubc Cre LepR <sup>tg</sup> (p/p) | 24.1B1    | M   | 10   | ND             | ND                   | ND                       | ND                  | ND                      | ND                               | ND                                   | ND                                      | ND                                   | ND             | ND                   | ND                       | ND                  | ND                      | ND                               | ND                                   | ND                                      | ND                                   | ND             | ND                   | ND                       | ND                  | ND                      | ND                               | ND                                   | ND                                      | ND                                   | ND             | ND                   | ND                       | ND                  | ND                      | ND                               | ND                                   | ND                                      | ND                                   | ND     |        |        |        |
|         |  | Ubc Cre LepR <sup>tg</sup> (p/p) | 24.2B1    | M   | 11   | ND             | ND                   | ND                       | ND                  | ND                      | ND                               | ND                                   | ND                                      | ND                                   | ND             | ND                   | ND                       | ND                  | ND                      | ND                               | ND                                   | ND                                      | ND                                   | ND             | ND                   | ND                       | ND                  | ND                      | ND                               | ND                                   | ND                                      | ND                                   | ND             | ND                   | ND                       | ND                  | ND                      | ND                               | ND                                   | ND                                      | ND                                   | ND     | ND     | ND     |        |
|         |  | Ubc Cre LepR <sup>tg</sup> (p/p) | 24.3B1    | M   | 12   | ND             | ND                   | ND                       | ND                  | ND                      | ND                               | ND                                   | ND                                      | ND                                   | ND             | ND                   | ND                       | ND                  | ND                      | ND                               | ND                                   | ND                                      | ND                                   | ND             | ND                   | ND                       | ND                  | ND                      | ND                               | ND                                   | ND                                      | ND                                   | ND             | ND                   | ND                       | ND                  | ND                      | ND                               | ND                                   | ND                                      | ND                                   | ND     | ND     | ND     |        |
|         |  | Average                          |           |     |      | 2678.2         | 1396.4               | 52.38                    | 630.9               | 24.48                   | 62.6                             | 2.44                                 | 12.82                                   | 19.18                                | 3168.4         | 1445.4               | 45.78                    | 657.2               | 21.38                   | 71.4                             | 2.51                                 | 9.86                                    | 25.19                                | 5866.7         | 2841.9               | 48.91                    | 1288.1              | 22.68                   | 134.00                           | 2.43                                 | 11.18                                   | 21.42                                | 5866.7         | 2841.9               | 48.91                    | 1288.1              | 22.68                   | 134.00                           | 2.43                                 | 11.18                                   | 21.42                                |        |        |        |        |
|         |  | SEM                              |           |     |      | 267.0          | 145.9                | 2.63                     | 73.9                | 3.40                    | 8.0                              | 0.38                                 | 1.75                                    | 1.10                                 | 583.5          | 256.9                | 1.77                     | 135.3               | 2.31                    | 13.6                             | 0.41                                 | 1.15                                    | 3.07                                 | 885.1          | 309.4                | 2.01                     | 177.3               | 2.36                    | 18.84                            | 0.71                                 | 1.28                                    | 1.57                                 | 885.1          | 309.4                | 2.01                     | 177.3               | 2.36                    | 18.84                            | 0.71                                 | 1.28                                    | 1.57                                 |        |        |        |        |
|         |  | p-value                          |           |     |      | 0.06           | 1.79E-06             | 2.18E-10                 | 6.07E-08            | 3.07E-05                | 2.77E-06                         | 2.81E-05                             | 6.05E-06                                | 0.07                                 | 0.54           | 0.0007               | 8.77E-12                 | 0.002               | 4.94E-08                | 0.0002                           | 4.41E-05                             | 1.29E-06                                | 0.91                                 | 0.58           | 4.13E-08             | 1.69E-11                 | 4.55E-05            | 2.45E-08                | 9.07E-08                         | 1.54E-05                             | 9.13E-07                                | 0.08                                 | 0.06           | 0.0007               | 0.0002                   | 0.0002              | 0.0002                  | 0.0002                           | 0.0002                               | 0.0002                                  | 0.0002                               | 0.0002 | 0.0002 | 0.0002 | 0.0002 |
|         |  | Group                            | ID Number | Sex | #    | Head Pancreas  |                      |                          |                     |                         |                                  |                                      |                                         |                                      |                | Tail Pancreas        |                          |                     |                         |                                  |                                      |                                         |                                      |                |                      | Total Pancreas           |                     |                         |                                  |                                      |                                         |                                      |                |                      |                          |                     |                         |                                  |                                      |                                         |                                      |        |        |        |        |
|         |  |                                  |           |     |      | $\beta$ -Cells | BrdU+ $\beta$ -Cells | BrdU+ $\beta$ -Cells (%) | Edu+ $\beta$ -Cells | Edu+ $\beta$ -Cells (%) | Actual BrdU+ Edu+ $\beta$ -Cells | Actual BrdU+ Edu+ $\beta$ -Cells (%) | Predicted BrdU+ Edu+ $\beta$ -Cells (%) | Actual BrdU+ Edu+ $\beta$ -Cells (%) | $\beta$ -Cells | BrdU+ $\beta$ -Cells | BrdU+ $\beta$ -Cells (%) | Edu+ $\beta$ -Cells | Edu+ $\beta$ -Cells (%) | Actual BrdU+ Edu+ $\beta$ -Cells | Actual BrdU+ Edu+ $\beta$ -Cells (%) | Predicted BrdU+ Edu+ $\beta$ -Cells (%) | Actual BrdU+ Edu+ $\beta$ -Cells (%) | $\beta$ -Cells | BrdU+ $\beta$ -Cells | BrdU+ $\beta$ -Cells (%) | Edu+ $\beta$ -Cells | Edu+ $\beta$ -Cells (%) | Actual BrdU+ Edu+ $\beta$ -Cells | Actual BrdU+ Edu+ $\beta$ -Cells (%) | Predicted BrdU+ Edu+ $\beta$ -Cells (%) | Actual BrdU+ Edu+ $\beta$ -Cells (%) | $\beta$ -Cells | BrdU+ $\beta$ -Cells | BrdU+ $\beta$ -Cells (%) | Edu+ $\beta$ -Cells | Edu+ $\beta$ -Cells (%) | Actual BrdU+ Edu+ $\beta$ -Cells | Actual BrdU+ Edu+ $\beta$ -Cells (%) | Predicted BrdU+ Edu+ $\beta$ -Cells (%) | Actual BrdU+ Edu+ $\beta$ -Cells (%) |        |        |        |        |
| Control |  | LepR <sup>tg</sup> (p/p)         | 87.2      | F   | 2420 | 90             | 3.72                 | 67                       | 2.77                | 0                       | 0.00                             | 0.15                                 | 0.00                                    |                                      |                |                      |                          |                     |                         |                                  |                                      |                                         |                                      |                |                      |                          |                     |                         |                                  |                                      |                                         |                                      |                |                      |                          |                     |                         |                                  |                                      |                                         |                                      |        |        |        |        |
